# Supplementary material for: An effective route to β2-amino acid derivatives via Pd-catalyzed regioselective hydrocarboxylation of 1,2-disubstituted enimides
Source: Royal Society of Chemistry journal article supplement (doi:10.1039/c6qo00353b), 2016-11-03

# An Effective Route to $\beta^2$ -Amino Acid Derivatives via Pd-Catalyzed Regioselective Hydrocarboxylation of 1,2-Disubstituted Enimides

Jie Dai,<sup>a</sup> Wenlong Ren,<sup>a</sup> Wenju Chang,<sup>a</sup> Ping Zhang,<sup>a</sup> and Yian Shi<sup>\*,a,b</sup>

*<sup>a</sup>State Key Laboratory of Coordination Chemistry, Collaborative Innovation Center of Chemistry for Life Sciences, Center for Multimolecular Organic Chemistry, School of Chemistry and Chemical Engineering, Nanjing University, Nanjing 210093, China;*  
*<sup>b</sup>Department of Chemistry, Colorado State University, Fort Collins, Colorado 80523, United States.*

## Supporting Information

### Table of Contents

|                                                   |      |
|---------------------------------------------------|------|
| Experimental procedures and characterization data | S-2  |
| X-ray structure of <b>2n</b>                      | S-9  |
| NMR spectra                                       | S-20 |

**General Methods.** All commercially available reagents were used without further purification. All solvents used for the reaction were purified with solvent purification system. Column chromatography was performed on silica gel (200-300 mesh). <sup>1</sup>H NMR spectra were recorded on a 400 MHz NMR spectrometer and <sup>13</sup>C NMR spectra were recorded on a 100 MHz NMR spectrometer. IR spectra were recorded on a FT-IR spectrometer. Melting points were uncorrected. (*E*)-1,2-Disubstituted enimides were synthesized from *N*-vinylphthalimide and the corresponding aryl iodides via Heck reaction according to the reported procedure.<sup>1</sup> (*Z*)-1,2-Disubstituted enimides were synthesized via Ru-catalyzed addition of *o*-phthalimide to the corresponding alkynes based on the reported method.<sup>2</sup>

- 1) Nanteuil, de F.; Waser, J. *Angew. Chem. Int. Ed.* **2013**, *52*, 9009
- 2) Goossen, L. J.; Blanchot, M.; Brinkmann, C.; Goossen, K.; Karch, R.; Rivas-Nass, A. *J. Org. Chem.* **2006**, *71*, 9506

**Representative procedure for hydrocarboxylation (Table 2, 2a).** To a mixture of ( $\eta^3$ -C<sub>3</sub>H<sub>5</sub>)<sub>2</sub>Pd<sub>2</sub>Cl<sub>2</sub> (0.00457 g, 0.0125 mmol), PPh<sub>3</sub> (0.02623 g, 0.10 mmol), and toluene (0.250 mL) in a vial (1.5 mL) were added enimide **1a** (0.1246 g, 0.50 mmol), HCOOPh (0.0733 g, 0.60 mmol), and HCOOH (0.046 g, 1.00 mmol) successively via syringe. The vial was purged with Ar to remove the air and tightly sealed with a septum cap. The reaction mixture was stirred at 80 °C for 48 h, cooled to rt, and purified by flash chromatography (silica gel, eluent: DCM/MeOH = 80/1) to give compound **2a** as a light yellow solid (0.1462 g, 99% yield).

**Table 2, 2a**

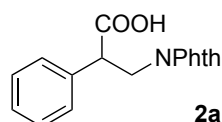

Yellow solid; mp. 167-168 °C; IR (film) 1777, 1707, 720 cm<sup>-1</sup>; <sup>1</sup>H NMR (400 MHz, CDCl<sub>3</sub>)  $\delta$  7.80-7.74 (m, 2H), 7.71-7.64 (m, 2H), 7.36-7.24 (m, 5H), 4.35 (dd, *J* = 8.8, 7.1 Hz, 1H), 4.24 (dd, *J* = 13.8, 7.1 Hz, 1H), 4.24 (dd, *J* = 13.8, 8.9 Hz, 1H);

$^{13}\text{C}$  NMR (100 MHz, DMSO- $d_6$ )  $\delta$  172.7, 167.4, 136.3, 134.5, 131.2, 128.5, 128.1, 127.6, 123.1, 48.7, 40.0; HRMS (ESI) Calcd for  $\text{C}_{17}\text{H}_{14}\text{NO}_4$  (M+H): 296.0917; Found: 296.0917.

Calmès, M.; Escale, F. *Tetrahedron: Asymmetry* **1998**, *9*, 2845

**Table 2, 2b**

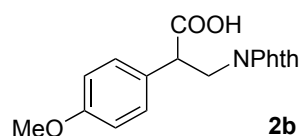

Yellow solid; mp. 201-203 °C; IR (film) 1771, 1707, 717  $\text{cm}^{-1}$ ;  $^1\text{H}$  NMR (400 MHz,  $\text{CDCl}_3$ )  $\delta$  7.81-7.74 (m, 2H), 7.71-7.64 (m, 2H), 7.28-7.23 (m, 2H), 6.84-6.78 (m, 2H), 4.31 (dd,  $J = 9.0, 7.2$  Hz, 1H), 4.23-4.12 (m, 2H), 3.75 (s, 3H);  $^{13}\text{C}$  NMR (100 MHz, DMSO- $d_6$ )  $\delta$  173.0, 167.5, 158.6, 134.5, 131.2, 129.2, 128.1, 123.1, 113.9, 55.0, 47.9, 40.1; HRMS (ESI) Calcd for  $\text{C}_{18}\text{H}_{16}\text{NO}_5$  (M+H): 326.1023; Found: 326.1021.

Calmès, M.; Escale, F.; Glot, C.; Rolland, M.; Martinez, J. *Eur. J. Org. Chem.* **2000**, 2459

**Table 2, 2c**

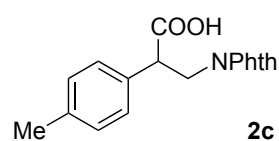

Yellow solid; mp. 181-182 °C; IR (film) 1771, 1707, 711  $\text{cm}^{-1}$ ;  $^1\text{H}$  NMR (400 MHz,  $\text{CDCl}_3$ )  $\delta$  7.81-7.74 (m, 2H), 7.71-7.64 (m, 2H), 7.22 (d,  $J = 8.0$  Hz, 2H), 7.09 (d,  $J = 7.9$  Hz, 2H), 4.31 (dd,  $J = 8.7, 7.2$  Hz, 1H), 4.22 (dd,  $J = 13.8, 7.1$  Hz, 1H), 4.16 (dd,  $J = 13.8, 9.0$  Hz, 1H), 2.28 (s, 3H);  $^{13}\text{C}$  NMR (100 MHz, DMSO- $d_6$ )  $\delta$  173.3, 167.9, 137.2, 135.0, 133.7, 131.7, 129.6, 128.4, 123.5, 48.8, 40.5, 21.1; HRMS (ESI) Calcd for  $\text{C}_{18}\text{H}_{16}\text{NO}_4$  (M+H): 310.1074; Found: 310.1066.

**Table 2, 2d**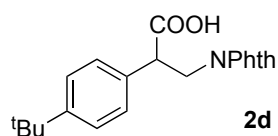

Yellow solid; mp. 220-222 °C; IR (film) 1774, 1718, 720 cm<sup>-1</sup>; <sup>1</sup>H NMR (400 MHz, CDCl<sub>3</sub>) δ 7.81-7.75 (m, 2H), 7.71-7.64 (m, 2H), 7.33-7.25 (m, 4H), 4.37-4.22 (m, 2H), 4.11 (dd, *J* = 13.4, 7.6 Hz, 1H), 1.26 (s, 9H); <sup>13</sup>C NMR (100 MHz, DMSO-*d*<sub>6</sub>) δ 172.8, 167.5, 149.9, 134.5, 133.2, 131.3, 127.7, 125.3, 123.1, 48.3, 40.0, 34.2, 31.0; HRMS (ESI) Calcd for C<sub>21</sub>H<sub>22</sub>NO<sub>4</sub> (M+H): 352.1543; Found: 352.1544.

**Table 2, 2e**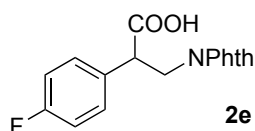

Yellow solid; mp. 182-183 °C; IR (film) 1774, 1704, 717 cm<sup>-1</sup>; <sup>1</sup>H NMR (400 MHz, CDCl<sub>3</sub>) δ 7.81-7.74 (m, 2H), 7.72-7.65 (m, 2H), 7.34-7.28 (m, 2H), 7.01-6.94 (m, 2H), 4.33 (t, *J* = 8.4 Hz, 1H), 4.19 (d, *J* = 8.1 Hz, 2H); <sup>13</sup>C NMR (100 MHz, DMSO-*d*<sub>6</sub>) δ 172.6, 167.4, 161.5 (d, *J* = 242.1 Hz), 134.6, 132.5 (d, *J* = 3.0 Hz), 131.2, 130.2 (d, *J* = 8.1 Hz), 123.1, 115.3 (d, *J* = 21.2 Hz), 48.0, 40.0; HRMS (ESI) Calcd for C<sub>17</sub>H<sub>13</sub>FNO<sub>4</sub> (M+H): 314.0823; Found: 314.0826.

Calmès, M.; Escalé, F.; Glot, C.; Rolland, M.; Martinez, J. *Eur. J. Org. Chem.* **2000**, 2459

**Table 2, 2f**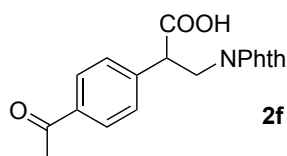

Yellow solid; mp. 205-207 °C; IR (film) 1771, 1709, 1681, 717 cm<sup>-1</sup>; <sup>1</sup>H NMR (400 MHz, DMSO-*d*<sub>6</sub>) δ 12.94 (br s, 1H), 7.87 (d, *J* = 8.2 Hz, 2H), 7.84-7.78 (m, 4H),

7.42 (d,  $J = 8.2$  Hz, 2H), 4.21 (dd,  $J = 9.2, 6.5$  Hz, 1H), 4.13 (dd,  $J = 13.8, 6.5$  Hz, 1H), 4.05 (dd,  $J = 13.8, 9.4$  Hz, 1H), 2.53 (s, 3H);  $^{13}\text{C}$  NMR (100 MHz, DMSO- $d_6$ )  $\delta$  197.6, 172.2, 167.5, 141.7, 136.1, 134.6, 131.2, 128.6, 128.5, 123.2, 48.9, 39.8, 26.7; HRMS (ESI) Calcd for  $\text{C}_{19}\text{H}_{16}\text{NO}_5$  (M+H): 338.1023; Found: 338.1020.

**Table 2, 2g**

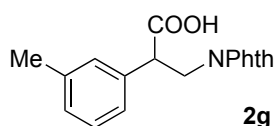

Yellow solid; mp. 146-148 °C; IR (film) 1774, 1707, 1693, 717  $\text{cm}^{-1}$ ;  $^1\text{H}$  NMR (400 MHz,  $\text{CDCl}_3$ )  $\delta$  7.82-7.75 (m, 2H), 7.71-7.65 (m, 2H), 7.21-7.11 (m, 3H), 7.09-7.05 (m, 1H), 4.36-4.20 (m, 2H), 4.13 (dd,  $J = 13.6, 8.2$  Hz, 1H), 2.29 (s, 3H);  $^{13}\text{C}$  NMR (100 MHz, DMSO- $d_6$ )  $\delta$  172.7, 167.5, 137.7, 136.2, 134.5, 131.2, 128.6, 128.4, 128.2, 125.1, 123.1, 48.6, 40.0, 20.9; HRMS (ESI) Calcd for  $\text{C}_{18}\text{H}_{16}\text{NO}_4$  (M+H): 310.1074; Found: 310.1072.

**Table 2, 2h**

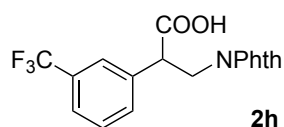

Yellow solid; mp. 129-130 °C; IR (film) 1776, 1704, 708  $\text{cm}^{-1}$ ;  $^1\text{H}$  NMR (400 MHz, DMSO- $d_6$ )  $\delta$  7.84-7.77 (m, 4H), 7.64-7.56 (m, 3H), 7.55-7.47 (m, 1H), 4.23 (dd,  $J = 9.3, 6.4$  Hz, 1H), 4.14 (dd,  $J = 13.8, 6.4$  Hz, 1H), 4.05 (dd,  $J = 13.8, 9.4$  Hz, 1H);  $^{13}\text{C}$  NMR (100 MHz, DMSO- $d_6$ )  $\delta$  172.2, 167.4, 137.8, 134.6, 132.6, 131.2, 129.6, 129.1 (q,  $J = 31.4$  Hz), 124.9 (q,  $J = 3.7$  Hz), 124.4 (q,  $J = 3.6$  Hz), 124.0 (q,  $J = 270.8$  Hz), 123.1, 48.6, 39.8; HRMS (ESI) Calcd for  $\text{C}_{18}\text{H}_{13}\text{F}_3\text{NO}_4$  (M+H): 364.0791; Found: 364.0787.

**Table 2, 2i**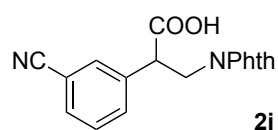

Yellow solid; mp. 202-204 °C; IR (film) 2225, 1777, 1707, 708 cm<sup>-1</sup>; <sup>1</sup>H NMR (400 MHz, DMSO-*d*<sub>6</sub>) δ 13.04 (br s, 1H), 7.86-7.76 (m, 5H), 7.72 (d, *J* = 7.7 Hz, 1H), 7.65 (d, *J* = 7.9 Hz, 1H), 7.50 (t, *J* = 7.8 Hz, 1H), 4.21-4.11 (m, 2H), 4.04 (dd, *J* = 15.2, 11.1 Hz, 1H); <sup>13</sup>C NMR (100 MHz, DMSO-*d*<sub>6</sub>) δ 172.1, 167.4, 138.1, 134.6, 133.5, 132.2, 131.4, 131.2, 129.7, 123.2, 118.6, 111.4, 48.6, 39.8; HRMS (ESI) Calcd for C<sub>18</sub>H<sub>13</sub>N<sub>2</sub>O<sub>4</sub> (M+H): 321.0870; Found: 321.0877.

**Table 2, 2j**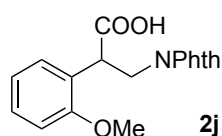

Yellow solid; mp. 179-181 °C; IR (film) 1770, 1709, 716 cm<sup>-1</sup>; <sup>1</sup>H NMR (400 MHz, DMSO-*d*<sub>6</sub>) δ 12.57 (br s, 1H), 7.79 (br s, 4H), 7.17 (t, *J* = 7.4 Hz, 1H), 7.10 (d, *J* = 7.2 Hz, 1H), 6.90-6.76 (m, 2H), 4.30 (t, *J* = 8.0 Hz, 1H), 4.03 (d, *J* = 7.8 Hz, 2H), 3.55 (s, 3H); <sup>13</sup>C NMR (100 MHz, DMSO-*d*<sub>6</sub>) δ 172.9, 167.3, 157.0, 134.4, 131.3, 129.1, 128.8, 125.0, 122.9, 120.4, 111.0, 55.3, 42.9, 38.9; HRMS (ESI) Calcd for C<sub>18</sub>H<sub>16</sub>NO<sub>5</sub> (M+H): 326.1023; Found: 326.1022.

**Table 2, 2k**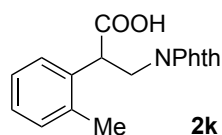

Yellow solid; mp. 173-175 °C; IR (film) 1773, 1706, 716 cm<sup>-1</sup>; <sup>1</sup>H NMR (400 MHz, DMSO-*d*<sub>6</sub>) δ 12.70 (br s, 1H), 7.85-7.78 (m, 4H), 7.27 (d, *J* = 7.0 Hz, 1H), 7.19-7.08 (m, 3H), 4.42 (t, *J* = 8.0 Hz, 1H), 4.13 (dd, *J* = 13.8, 7.6 Hz, 1H), 3.96 (dd, *J* = 13.8, 8.2 Hz, 1H), 2.28 (s, 3H); <sup>13</sup>C NMR (100 MHz, DMSO-*d*<sub>6</sub>) δ 173.0, 167.6, 136.3, 134.8, 134.6, 131.2, 130.4, 127.4, 127.1, 126.2, 123.1, 44.5, 39.4, 19.0;

HRMS (ESI) Calcd for C<sub>18</sub>H<sub>16</sub>NO<sub>4</sub> (M+H): 310.1074; Found: 310.1076.

**Table 2, 2m**

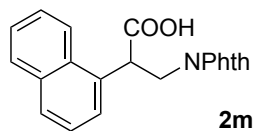

Yellow solid; mp. 175-177 °C; IR (film) 1767, 1744, 1718, 722 cm<sup>-1</sup>; <sup>1</sup>H NMR (400 MHz, DMSO-*d*<sub>6</sub>) δ 12.84 (br s, 1H), 8.13 (d, *J* = 8.4 Hz, 1H), 7.92 (d, *J* = 7.9 Hz, 1H), 7.85 (d, *J* = 7.7 Hz, 1H), 7.82-7.74 (m, 4H), 7.59-7.44 (m, 4H), 4.95 (t, *J* = 7.6 Hz, 1H), 4.35 (dd, *J* = 13.8, 7.9 Hz, 1H), 4.06 (dd, *J* = 13.8, 7.6 Hz, 1H); <sup>13</sup>C NMR (100 MHz, DMSO-*d*<sub>6</sub>) δ 173.1, 167.6, 134.5, 133.5, 132.8, 131.3, 131.2, 128.9, 128.1, 126.6, 125.8, 125.5, 125.4, 123.0, 122.8, 44.5, 40.0; HRMS (ESI) Calcd for C<sub>21</sub>H<sub>16</sub>NO<sub>4</sub> (M+H): 346.1074; Found: 346.1073.

Calmès, M.; Escale, F.; Glot, C.; Rolland, M.; Martinez J. *Eur. J. Org. Chem.* **2000**, 2459

**Table 2, 2n**

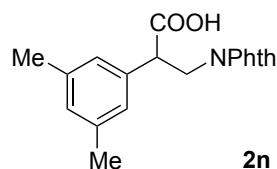

Yellow solid; mp. 187-189 °C; IR (film) 1774, 1719, 716 cm<sup>-1</sup>; <sup>1</sup>H NMR (400 MHz, CDCl<sub>3</sub>) δ 7.82-7.76 (m, 2H), 7.71-7.65 (m, 2H), 6.95 (s, 2H), 6.89 (s, 1H), 4.31-4.21 (m, 2H), 4.12-4.01 (m, 1H), 2.25 (s, 6H); <sup>13</sup>C NMR (100 MHz, DMSO-*d*<sub>6</sub>) δ 172.7, 167.5, 137.5, 136.1, 134.5, 131.2, 129.0, 125.7, 123.1, 48.5, 40.0, 20.8; HRMS (ESI) Calcd for C<sub>19</sub>H<sub>18</sub>NO<sub>4</sub> (M+H): 324.1230; Found: 324.1234.

**Table 2, 2o**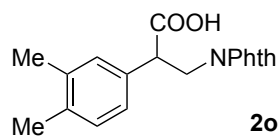

Yellow solid; mp. 181-183 °C; IR (film) 1768, 1718, 716  $\text{cm}^{-1}$ ;  $^1\text{H}$  NMR (400 MHz,  $\text{CDCl}_3$ )  $\delta$  7.82-7.75 (m, 2H), 7.71-7.65 (m, 2H), 7.12-7.02 (m, 3H), 4.32-4.19 (m, 2H), 4.11 (dd,  $J = 13.3, 8.0$  Hz, 1H), 2.19 (s, 3H), 2.189 (s, 3H);  $^{13}\text{C}$  NMR (100 MHz,  $\text{DMSO-}d_6$ )  $\delta$  172.9, 167.5, 136.3, 135.5, 134.5, 133.6, 131.2, 129.6, 129.1, 125.3, 123.1, 48.3, 40.0, 19.3, 19.0; HRMS (ESI) Calcd for  $\text{C}_{19}\text{H}_{18}\text{NO}_4$  (M+H): 324.1230; Found: 324.1236.

### Procedure for the hydrolysis in Scheme 5

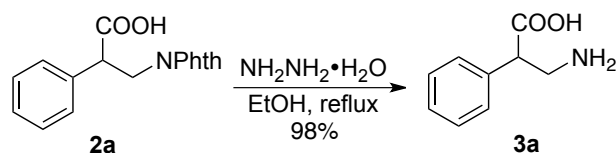

To a solution of compound **2a** (0.1476 g, 0.50 mmol) in EtOH (14 mL) was added hydrazine hydrate (0.41 g, 8.3 mmol) dropwise. The reaction mixture was stirred at reflux for 10 h, cooled to rt, filtered, and washed with ether (3x). The filter cake was dissolved in water (15 mL) and was washed with AcOEt. The aqueous layer was lyophilized to give amino acid **3a** as a white solid (0.0811 g, 98%); mp. 212-213 °C; IR (film) 3449, 1649, 1621, 1564, 693  $\text{cm}^{-1}$ ;  $^1\text{H}$  NMR (400 MHz,  $\text{D}_2\text{O}$ )  $\delta$  7.48-7.30 (m, 5H), 3.79 (t,  $J = 7.5$  Hz, 1H), 3.47 (dd,  $J = 12.8, 7.8$  Hz, 1H), 3.28 (dd,  $J = 12.8, 7.2$  Hz, 1H);  $^{13}\text{C}$  NMR (100 MHz,  $\text{D}_2\text{O}$ )  $\delta$  178.3, 137.2, 129.2, 128.1, 127.9, 51.4, 42.3; HRMS (ESI) Calcd for  $\text{C}_9\text{H}_{12}\text{NO}_2$  (M+H): 166.0863; Found: 166.0860.

- 1) Calmès, M.; Escale, F.; Glot, C.; Rolland, M.; Martinez, J. *Eur. J. Org. Chem.* **2000**, 2459
- 2) Weiner, B.; Baeza, A.; Jerphagnon, T. B.; Feringa, L. *J. Am. Chem. Soc.* **2009**, *131*, 9473
- 3) Stefani, H. A.; Amaral, M. F. Z. J.; Reyes-Rangel, G.; Vargas-Caporali, J.; Juaristi, E. *Eur. J. Org. Chem.* **2010**, 6393



The X-ray structure of compound **2n**

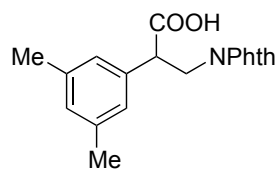

**2n**

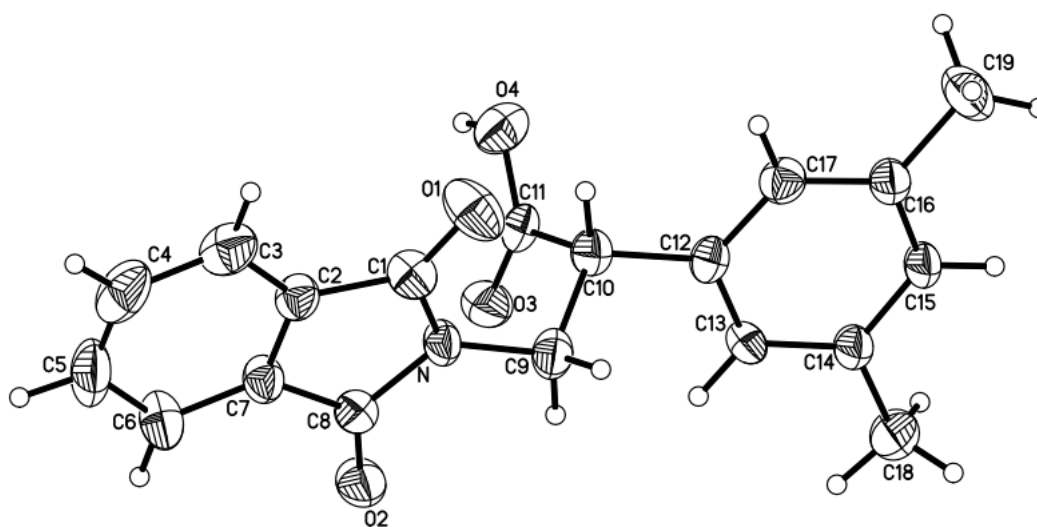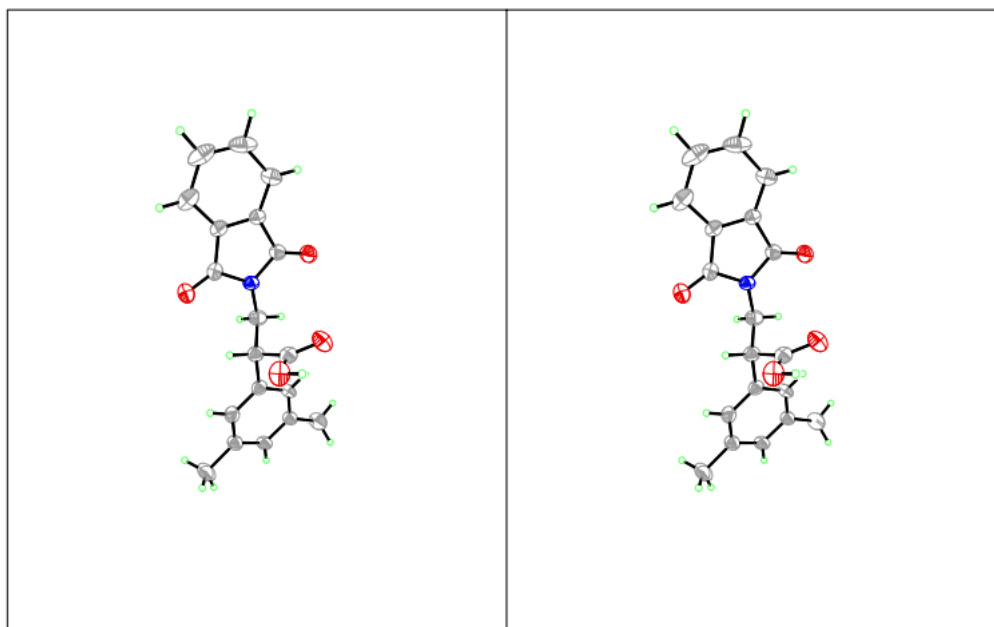

Table 1. Crystal data and structure refinement for **2n**.

|                                            |                                                 |                                  |
|--------------------------------------------|-------------------------------------------------|----------------------------------|
| Identification code                        | <b>2n</b>                                       |                                  |
| Empirical formula                          | C <sub>19</sub> H <sub>17</sub> NO <sub>4</sub> |                                  |
| Formula weight                             | 323.34                                          |                                  |
| Temperature                                | 293(2) K                                        |                                  |
| Wavelength                                 | 0.71073 Å                                       |                                  |
| Crystal system                             | Triclinic                                       |                                  |
| Space group                                | P-1                                             |                                  |
| Unit cell dimensions                       | a = 8.1250(16) Å                                | alpha = 90.91(3) <sup>o</sup> .  |
|                                            | b = 9.3280(19) Å                                | beta = 96.19(3) <sup>o</sup> .   |
|                                            | c = 11.408(2) Å                                 | gamma = 107.69(3) <sup>o</sup> . |
| Volume                                     | 817.8(3) Å <sup>3</sup>                         |                                  |
| Z                                          | 2                                               |                                  |
| Calculated density                         | 1.313 Mg/m <sup>3</sup>                         |                                  |
| Absorption coefficient                     | 0.093 mm <sup>-1</sup>                          |                                  |
| F(000)                                     | 340                                             |                                  |
| Crystal size                               | 0.20 x 0.20 x 0.10 mm <sup>3</sup>              |                                  |
| Theta range for data collection            | 1.80 to 25.37 <sup>o</sup>                      |                                  |
| Limiting indices                           | 0<=h<=9, -11<=k<=10, -13<=l<=13                 |                                  |
| Reflections collected / unique             | 3234 / 3007 [R(int) = 0.0378]                   |                                  |
| Completeness to theta = 25.37 <sup>o</sup> | 99.9 %                                          |                                  |
| Absorption correction                      | Psi-scan                                        |                                  |
| Max. and min. transmission                 | 0.9908 and 0.9817                               |                                  |
| Refinement method                          | Full-matrix least-squares on F <sup>2</sup>     |                                  |
| Data / restraints / parameters             | 3007 / 0 / 217                                  |                                  |
| Goodness-of-fit on F <sup>2</sup>          | 1.001                                           |                                  |
| Final R indices [I>2sigma(I)]              | R1 = 0.0691, wR2 = 0.1238                       |                                  |
| R indices (all data)                       | R1 = 0.1599, wR2 = 0.1481                       |                                  |
| Largest diff. peak and hole                | 0.174 and -0.164 e. Å <sup>-3</sup>             |                                  |

Table 2. Atomic coordinates ( $\times 10^4$ ) and equivalent isotropic displacement parameters ( $\text{\AA}^2 \times 10^3$ ) for **2n**.  $U(\text{eq})$  is defined as one third of the trace of the orthogonalized  $U^{ij}$  tensor.

|       | x        | y        | z       | U(eq) |
|-------|----------|----------|---------|-------|
| N     | 7101(4)  | 5661(3)  | 6651(3) | 51(1) |
| O(1)  | 10037(4) | 6857(3)  | 7012(3) | 90(1) |
| C(1)  | 8836(5)  | 5725(5)  | 6703(4) | 59(1) |
| O(2)  | 4444(3)  | 3880(3)  | 6031(2) | 70(1) |
| C(2)  | 8852(5)  | 4215(4)  | 6342(3) | 54(1) |
| O(3)  | 4539(4)  | 5570(3)  | 8629(2) | 73(1) |
| C(3)  | 10256(6) | 3680(6)  | 6272(4) | 76(1) |
| O(4)  | 6927(3)  | 6395(3)  | 9914(3) | 73(1) |
| C(4)  | 9848(8)  | 2188(7)  | 5849(4) | 92(2) |
| C(5)  | 8175(8)  | 1311(5)  | 5564(4) | 93(2) |
| C(6)  | 6766(6)  | 1868(5)  | 5643(4) | 76(1) |
| C(7)  | 7177(5)  | 3323(4)  | 6043(3) | 54(1) |
| C(8)  | 6007(5)  | 4236(4)  | 6218(3) | 52(1) |
| C(9)  | 6502(5)  | 6957(4)  | 6834(3) | 62(1) |
| C(10) | 6929(5)  | 7588(4)  | 8103(3) | 53(1) |
| C(11) | 6055(5)  | 6416(4)  | 8927(4) | 52(1) |
| C(12) | 6430(5)  | 9010(4)  | 8288(3) | 50(1) |
| C(13) | 4744(5)  | 9050(4)  | 7992(3) | 54(1) |
| C(14) | 4302(5)  | 10341(4) | 8185(3) | 52(1) |
| C(15) | 5605(5)  | 11602(4) | 8698(3) | 55(1) |
| C(16) | 7301(5)  | 11622(4) | 8995(3) | 56(1) |
| C(17) | 7682(5)  | 10308(4) | 8781(3) | 56(1) |
| C(18) | 2468(5)  | 10396(4) | 7905(4) | 81(1) |
| C(19) | 8669(6)  | 13015(4) | 9563(4) | 90(2) |

Table 3. Bond lengths [Å] and angles [°] for **2n**.

---

|              |          |
|--------------|----------|
| N-C(1)       | 1.387(4) |
| N-C(8)       | 1.402(4) |
| N-C(9)       | 1.454(4) |
| O(1)-C(1)    | 1.216(4) |
| C(1)-C(2)    | 1.465(5) |
| O(2)-C(8)    | 1.205(4) |
| C(2)-C(7)    | 1.365(5) |
| C(2)-C(3)    | 1.386(5) |
| O(3)-C(11)   | 1.251(4) |
| C(3)-C(4)    | 1.394(6) |
| C(3)-H(3A)   | 0.9300   |
| O(4)-C(11)   | 1.268(4) |
| O(4)-H(4B)   | 0.8200   |
| C(4)-C(5)    | 1.358(6) |
| C(4)-H(4A)   | 0.9300   |
| C(5)-C(6)    | 1.404(6) |
| C(5)-H(5A)   | 0.9300   |
| C(6)-C(7)    | 1.354(5) |
| C(6)-H(6A)   | 0.9300   |
| C(7)-C(8)    | 1.482(5) |
| C(9)-C(10)   | 1.517(5) |
| C(9)-H(9A)   | 0.9700   |
| C(9)-H(9B)   | 0.9700   |
| C(10)-C(11)  | 1.513(5) |
| C(10)-C(12)  | 1.518(4) |
| C(10)-H(10A) | 0.9800   |
| C(12)-C(17)  | 1.387(5) |
| C(12)-C(13)  | 1.387(5) |
| C(13)-C(14)  | 1.378(4) |
| C(13)-H(13A) | 0.9300   |
| C(14)-C(15)  | 1.391(5) |
| C(14)-C(18)  | 1.506(5) |
| C(15)-C(16)  | 1.378(5) |
| C(15)-H(15A) | 0.9300   |
| C(16)-C(17)  | 1.376(5) |
| C(16)-C(19)  | 1.512(5) |

|                  |          |
|------------------|----------|
| C(17)-H(17A)     | 0.9300   |
| C(18)-H(18A)     | 0.9600   |
| C(18)-H(18B)     | 0.9600   |
| C(18)-H(18C)     | 0.9600   |
| C(19)-H(19A)     | 0.9600   |
| C(19)-H(19B)     | 0.9600   |
| C(19)-H(19C)     | 0.9600   |
| C(1)-N-C(8)      | 110.9(3) |
| C(1)-N-C(9)      | 124.4(3) |
| C(8)-N-C(9)      | 124.0(3) |
| O(1)-C(1)-N      | 123.4(4) |
| O(1)-C(1)-C(2)   | 130.2(4) |
| N-C(1)-C(2)      | 106.5(3) |
| C(7)-C(2)-C(3)   | 121.9(4) |
| C(7)-C(2)-C(1)   | 108.8(3) |
| C(3)-C(2)-C(1)   | 129.3(4) |
| C(2)-C(3)-C(4)   | 115.7(4) |
| C(2)-C(3)-H(3A)  | 122.1    |
| C(4)-C(3)-H(3A)  | 122.1    |
| C(11)-O(4)-H(4B) | 109.5    |
| C(5)-C(4)-C(3)   | 121.6(4) |
| C(5)-C(4)-H(4A)  | 119.2    |
| C(3)-C(4)-H(4A)  | 119.2    |
| C(4)-C(5)-C(6)   | 122.0(4) |
| C(4)-C(5)-H(5A)  | 119.0    |
| C(6)-C(5)-H(5A)  | 119.0    |
| C(7)-C(6)-C(5)   | 115.9(4) |
| C(7)-C(6)-H(6A)  | 122.0    |
| C(5)-C(6)-H(6A)  | 122.0    |
| C(6)-C(7)-C(2)   | 122.8(4) |
| C(6)-C(7)-C(8)   | 129.1(4) |
| C(2)-C(7)-C(8)   | 108.1(3) |
| O(2)-C(8)-N      | 125.4(3) |
| O(2)-C(8)-C(7)   | 129.0(4) |
| N-C(8)-C(7)      | 105.6(3) |
| N-C(9)-C(10)     | 112.5(3) |
| N-C(9)-H(9A)     | 109.1    |
| C(10)-C(9)-H(9A) | 109.1    |

|                     |          |
|---------------------|----------|
| N-C(9)-H(9B)        | 109.1    |
| C(10)-C(9)-H(9B)    | 109.1    |
| H(9A)-C(9)-H(9B)    | 107.8    |
| C(11)-C(10)-C(9)    | 110.5(3) |
| C(11)-C(10)-C(12)   | 109.6(3) |
| C(9)-C(10)-C(12)    | 113.1(3) |
| C(11)-C(10)-H(10A)  | 107.8    |
| C(9)-C(10)-H(10A)   | 107.8    |
| C(12)-C(10)-H(10A)  | 107.8    |
| O(3)-C(11)-O(4)     | 124.1(4) |
| O(3)-C(11)-C(10)    | 119.8(4) |
| O(4)-C(11)-C(10)    | 116.1(4) |
| C(17)-C(12)-C(13)   | 118.5(3) |
| C(17)-C(12)-C(10)   | 119.5(3) |
| C(13)-C(12)-C(10)   | 121.9(3) |
| C(14)-C(13)-C(12)   | 121.3(3) |
| C(14)-C(13)-H(13A)  | 119.3    |
| C(12)-C(13)-H(13A)  | 119.3    |
| C(13)-C(14)-C(15)   | 117.6(3) |
| C(13)-C(14)-C(18)   | 122.2(4) |
| C(15)-C(14)-C(18)   | 120.1(3) |
| C(16)-C(15)-C(14)   | 123.2(3) |
| C(16)-C(15)-H(15A)  | 118.4    |
| C(14)-C(15)-H(15A)  | 118.4    |
| C(17)-C(16)-C(15)   | 117.1(4) |
| C(17)-C(16)-C(19)   | 121.6(4) |
| C(15)-C(16)-C(19)   | 121.3(3) |
| C(16)-C(17)-C(12)   | 122.2(4) |
| C(16)-C(17)-H(17A)  | 118.9    |
| C(12)-C(17)-H(17A)  | 118.9    |
| C(14)-C(18)-H(18A)  | 109.5    |
| C(14)-C(18)-H(18B)  | 109.5    |
| H(18A)-C(18)-H(18B) | 109.5    |
| C(14)-C(18)-H(18C)  | 109.5    |
| H(18A)-C(18)-H(18C) | 109.5    |
| H(18B)-C(18)-H(18C) | 109.5    |
| C(16)-C(19)-H(19A)  | 109.5    |
| C(16)-C(19)-H(19B)  | 109.5    |

|                     |       |
|---------------------|-------|
| H(19A)-C(19)-H(19B) | 109.5 |
| C(16)-C(19)-H(19C)  | 109.5 |
| H(19A)-C(19)-H(19C) | 109.5 |
| H(19B)-C(19)-H(19C) | 109.5 |

---

Symmetry transformations used to generate equivalent atoms:

Table 4. Anisotropic displacement parameters ( $\text{\AA}^2 \times 10^3$ ) for **2n**. The anisotropic displacement factor exponent takes the form:  $-2 \pi^2 [ h^2 a^{*2} U^{11} + \dots + 2 h k a^* b^* U^{12} ]$

|       | $U^{11}$ | $U^{22}$ | $U^{33}$ | $U^{23}$ | $U^{13}$ | $U^{12}$ |
|-------|----------|----------|----------|----------|----------|----------|
| N     | 49(2)    | 41(2)    | 66(2)    | -6(2)    | 5(2)     | 20(2)    |
| O(1)  | 61(2)    | 82(2)    | 112(3)   | -25(2)   | 22(2)    | -4(2)    |
| C(1)  | 49(3)    | 62(3)    | 64(3)    | -1(2)    | 14(2)    | 13(2)    |
| O(2)  | 49(2)    | 66(2)    | 91(2)    | -10(2)   | -3(2)    | 17(1)    |
| C(2)  | 53(3)    | 57(3)    | 58(3)    | 1(2)     | 9(2)     | 26(2)    |
| O(3)  | 72(2)    | 63(2)    | 72(2)    | 2(2)     | -9(2)    | 8(2)     |
| C(3)  | 71(3)    | 103(4)   | 69(3)    | 3(3)     | 13(3)    | 48(3)    |
| O(4)  | 67(2)    | 80(2)    | 75(2)    | 22(2)    | 6(2)     | 25(2)    |
| C(4)  | 110(5)   | 112(5)   | 87(4)    | 15(3)    | 24(4)    | 80(4)    |
| C(5)  | 138(5)   | 58(3)    | 99(4)    | 3(3)     | 23(4)    | 53(3)    |
| C(6)  | 84(3)    | 51(3)    | 92(4)    | -5(2)    | 14(3)    | 21(3)    |
| C(7)  | 50(2)    | 47(2)    | 68(3)    | -2(2)    | 9(2)     | 18(2)    |
| C(8)  | 54(3)    | 51(2)    | 51(3)    | 0(2)     | 4(2)     | 17(2)    |
| C(9)  | 77(3)    | 50(2)    | 65(3)    | 4(2)     | 7(2)     | 29(2)    |
| C(10) | 56(3)    | 49(2)    | 56(3)    | 1(2)     | 9(2)     | 20(2)    |
| C(11) | 58(3)    | 46(2)    | 61(3)    | 8(2)     | 9(2)     | 29(2)    |
| C(12) | 52(2)    | 47(2)    | 56(3)    | 4(2)     | 11(2)    | 24(2)    |
| C(13) | 59(3)    | 39(2)    | 55(3)    | -6(2)    | -4(2)    | 7(2)     |
| C(14) | 51(2)    | 45(2)    | 63(3)    | -4(2)    | 1(2)     | 20(2)    |
| C(15) | 57(3)    | 42(2)    | 68(3)    | -8(2)    | 0(2)     | 24(2)    |
| C(16) | 55(3)    | 47(2)    | 66(3)    | -3(2)    | 2(2)     | 18(2)    |
| C(17) | 47(2)    | 58(3)    | 64(3)    | 5(2)     | 6(2)     | 18(2)    |
| C(18) | 65(3)    | 74(3)    | 107(4)   | -9(3)    | -14(3)   | 34(2)    |
| C(19) | 73(3)    | 66(3)    | 118(4)   | -31(3)   | -13(3)   | 12(2)    |



Table 5. Hydrogen coordinates ( $\times 10^4$ ) and isotropic displacement parameters ( $\text{\AA}^2 \times 10^3$ ) for **2n**.

|        | x     | y     | z     | U(eq) |
|--------|-------|-------|-------|-------|
| H(3A)  | 11397 | 4278  | 6493  | 91    |
| H(4B)  | 6354  | 5736  | 10305 | 110   |
| H(4A)  | 10745 | 1783  | 5760  | 110   |
| H(5A)  | 7956  | 311   | 5309  | 111   |
| H(6A)  | 5620  | 1274  | 5434  | 91    |
| H(9A)  | 5253  | 6665  | 6619  | 75    |
| H(9B)  | 7039  | 7737  | 6320  | 75    |
| H(10A) | 8189  | 7840  | 8312  | 63    |
| H(13A) | 3895  | 8188  | 7657  | 65    |
| H(15A) | 5317  | 12474 | 8847  | 65    |
| H(17A) | 8817  | 10290 | 8974  | 67    |
| H(18A) | 1737  | 9439  | 7558  | 121   |
| H(18B) | 2454  | 11167 | 7360  | 121   |
| H(18C) | 2044  | 10617 | 8618  | 121   |
| H(19A) | 8163  | 13814 | 9633  | 135   |
| H(19B) | 9605  | 13319 | 9083  | 135   |
| H(19C) | 9108  | 12798 | 10332 | 135   |

Table 6. Torsion angles [ $^{\circ}$ ] for **2n**.

---

|                         |           |
|-------------------------|-----------|
| C(8)-N-C(1)-O(1)        | 177.5(4)  |
| C(9)-N-C(1)-O(1)        | 6.8(6)    |
| C(8)-N-C(1)-C(2)        | -3.3(4)   |
| C(9)-N-C(1)-C(2)        | -174.0(3) |
| O(1)-C(1)-C(2)-C(7)     | -178.4(5) |
| N-C(1)-C(2)-C(7)        | 2.4(4)    |
| O(1)-C(1)-C(2)-C(3)     | 0.8(8)    |
| N-C(1)-C(2)-C(3)        | -178.3(4) |
| C(7)-C(2)-C(3)-C(4)     | 1.6(6)    |
| C(1)-C(2)-C(3)-C(4)     | -177.6(4) |
| C(2)-C(3)-C(4)-C(5)     | -2.1(7)   |
| C(3)-C(4)-C(5)-C(6)     | 2.0(8)    |
| C(4)-C(5)-C(6)-C(7)     | -1.3(7)   |
| C(5)-C(6)-C(7)-C(2)     | 0.8(6)    |
| C(5)-C(6)-C(7)-C(8)     | 179.5(4)  |
| C(3)-C(2)-C(7)-C(6)     | -1.0(7)   |
| C(1)-C(2)-C(7)-C(6)     | 178.3(4)  |
| C(3)-C(2)-C(7)-C(8)     | 180.0(4)  |
| C(1)-C(2)-C(7)-C(8)     | -0.7(4)   |
| C(1)-N-C(8)-O(2)        | -176.6(4) |
| C(9)-N-C(8)-O(2)        | -5.9(6)   |
| C(1)-N-C(8)-C(7)        | 2.9(4)    |
| C(9)-N-C(8)-C(7)        | 173.6(3)  |
| C(6)-C(7)-C(8)-O(2)     | -0.8(7)   |
| C(2)-C(7)-C(8)-O(2)     | 178.2(4)  |
| C(6)-C(7)-C(8)-N        | 179.8(4)  |
| C(2)-C(7)-C(8)-N        | -1.3(4)   |
| C(1)-N-C(9)-C(10)       | -68.7(5)  |
| C(8)-N-C(9)-C(10)       | 121.8(4)  |
| N-C(9)-C(10)-C(11)      | -60.9(4)  |
| N-C(9)-C(10)-C(12)      | 175.8(3)  |
| C(9)-C(10)-C(11)-O(3)   | -39.7(5)  |
| C(12)-C(10)-C(11)-O(3)  | 85.6(4)   |
| C(9)-C(10)-C(11)-O(4)   | 142.2(3)  |
| C(12)-C(10)-C(11)-O(4)  | -92.5(4)  |
| C(11)-C(10)-C(12)-C(17) | 111.8(4)  |

|                         |           |
|-------------------------|-----------|
| C(9)-C(10)-C(12)-C(17)  | -124.4(4) |
| C(11)-C(10)-C(12)-C(13) | -67.3(4)  |
| C(9)-C(10)-C(12)-C(13)  | 56.5(5)   |
| C(17)-C(12)-C(13)-C(14) | -0.3(6)   |
| C(10)-C(12)-C(13)-C(14) | 178.8(3)  |
| C(12)-C(13)-C(14)-C(15) | -0.6(5)   |
| C(12)-C(13)-C(14)-C(18) | -178.1(4) |
| C(13)-C(14)-C(15)-C(16) | 1.3(6)    |
| C(18)-C(14)-C(15)-C(16) | 178.9(4)  |
| C(14)-C(15)-C(16)-C(17) | -1.0(6)   |
| C(14)-C(15)-C(16)-C(19) | -179.3(4) |
| C(15)-C(16)-C(17)-C(12) | 0.0(6)    |
| C(19)-C(16)-C(17)-C(12) | 178.3(4)  |
| C(13)-C(12)-C(17)-C(16) | 0.6(6)    |
| C(10)-C(12)-C(17)-C(16) | -178.6(3) |

---

Symmetry transformations used to generate equivalent atoms:

Table 7. Hydrogen bonds for **2n** [Å and °].

---

| D-H...A | d(D-H) | d(H...A) | d(D...A) | <(DHA) |
|---------|--------|----------|----------|--------|
|---------|--------|----------|----------|--------|

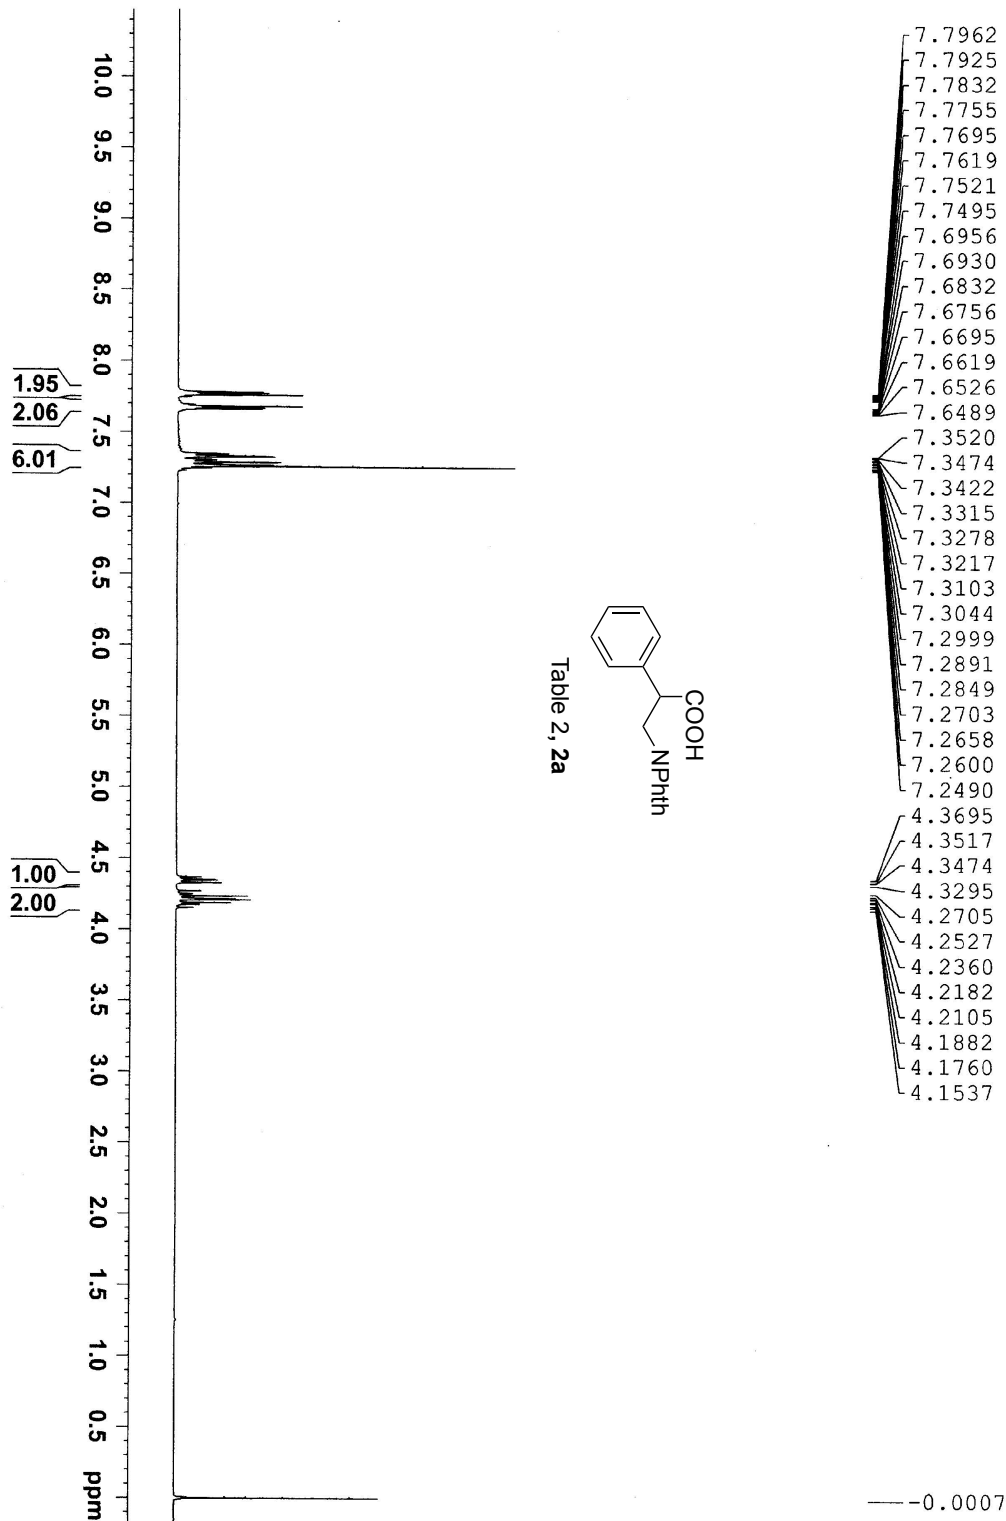

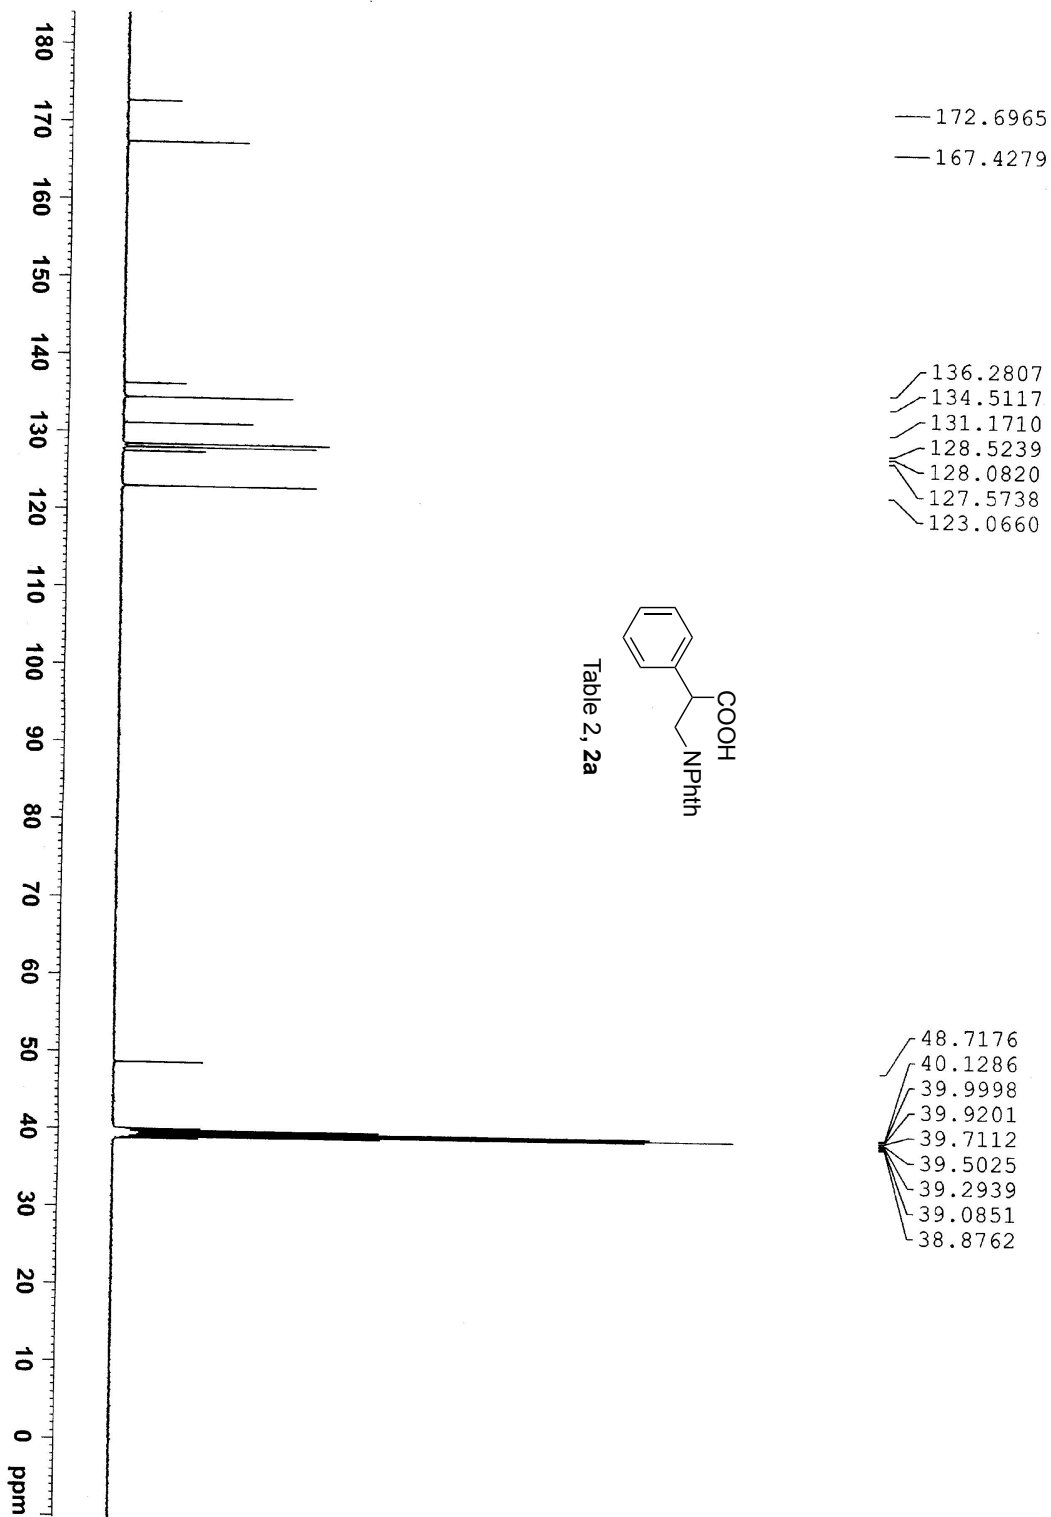

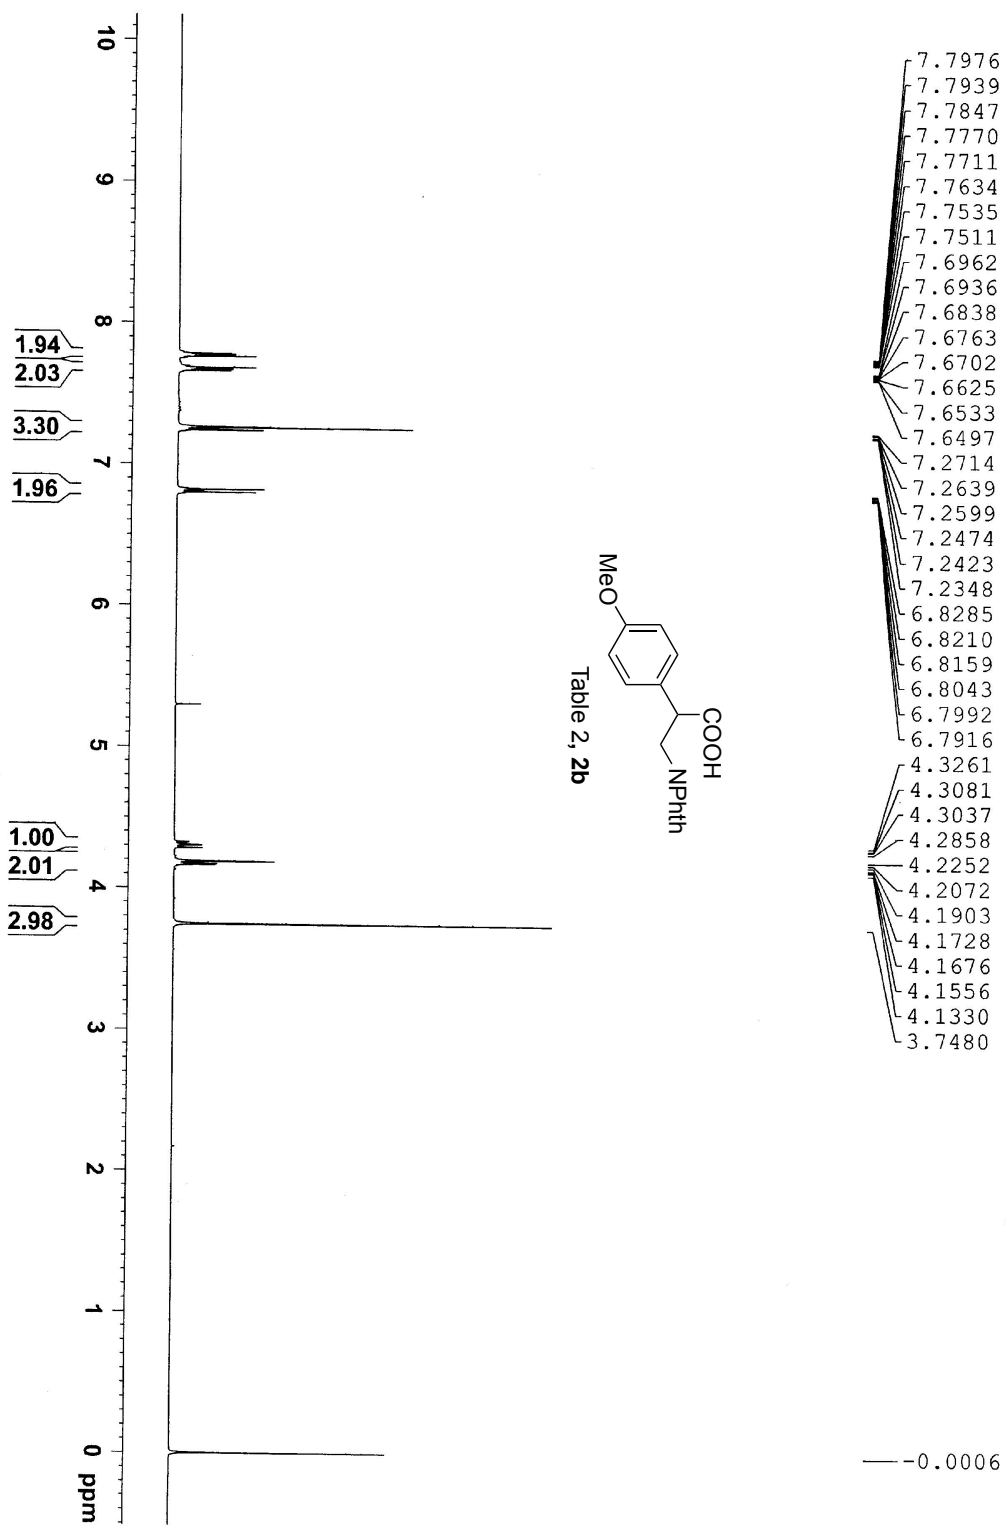

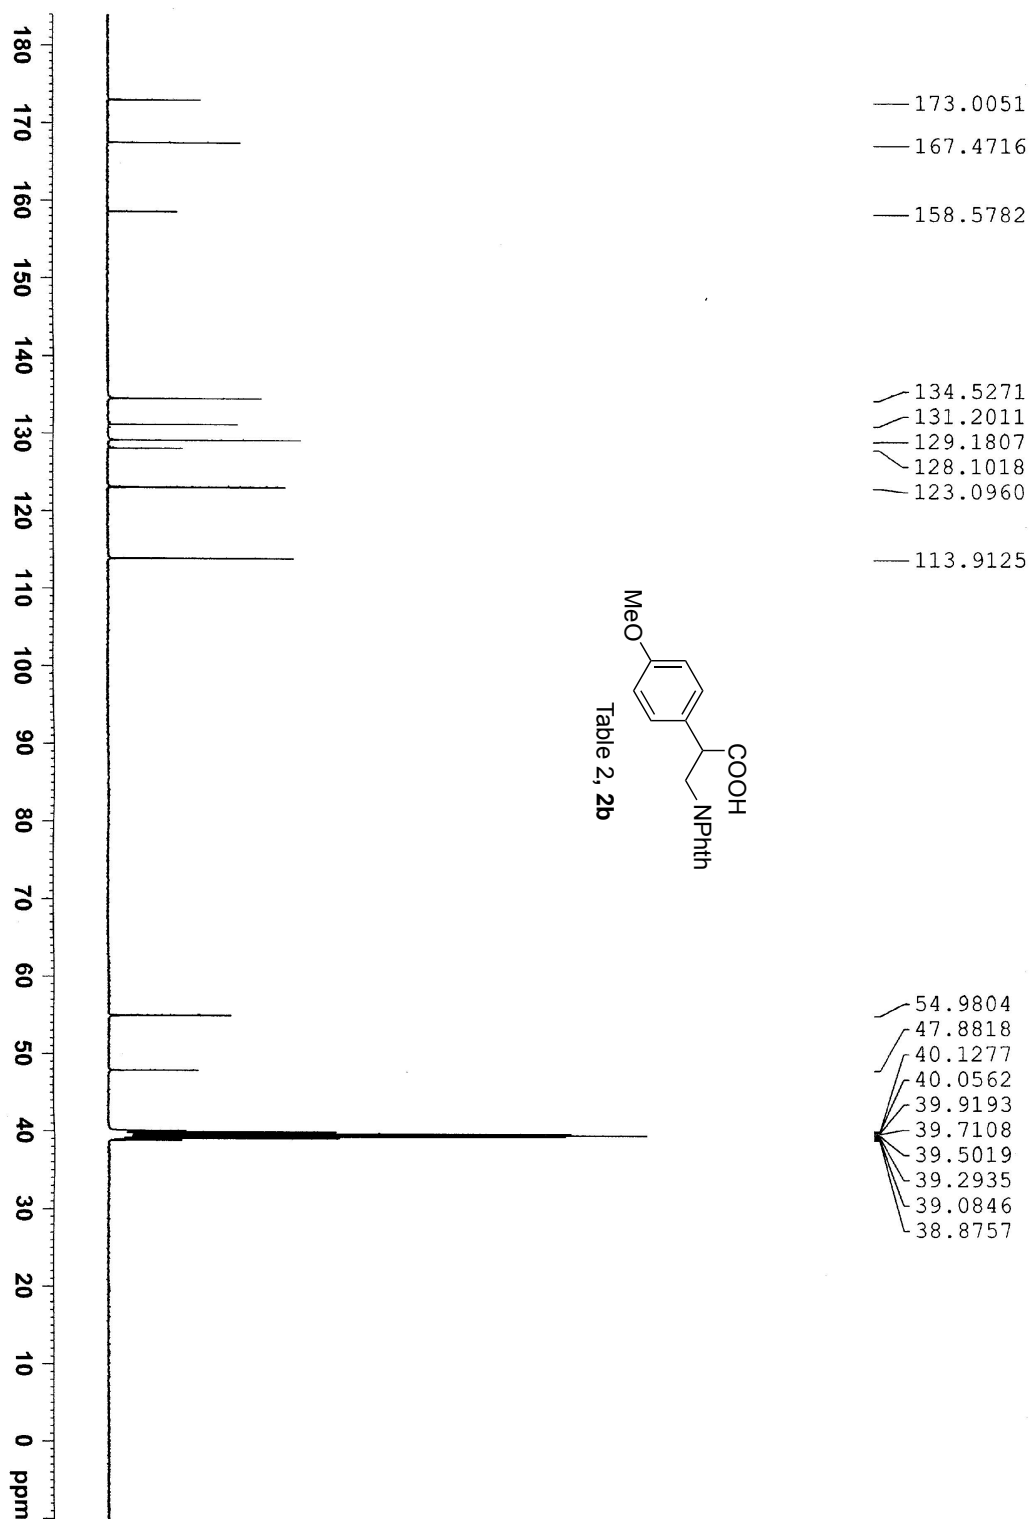

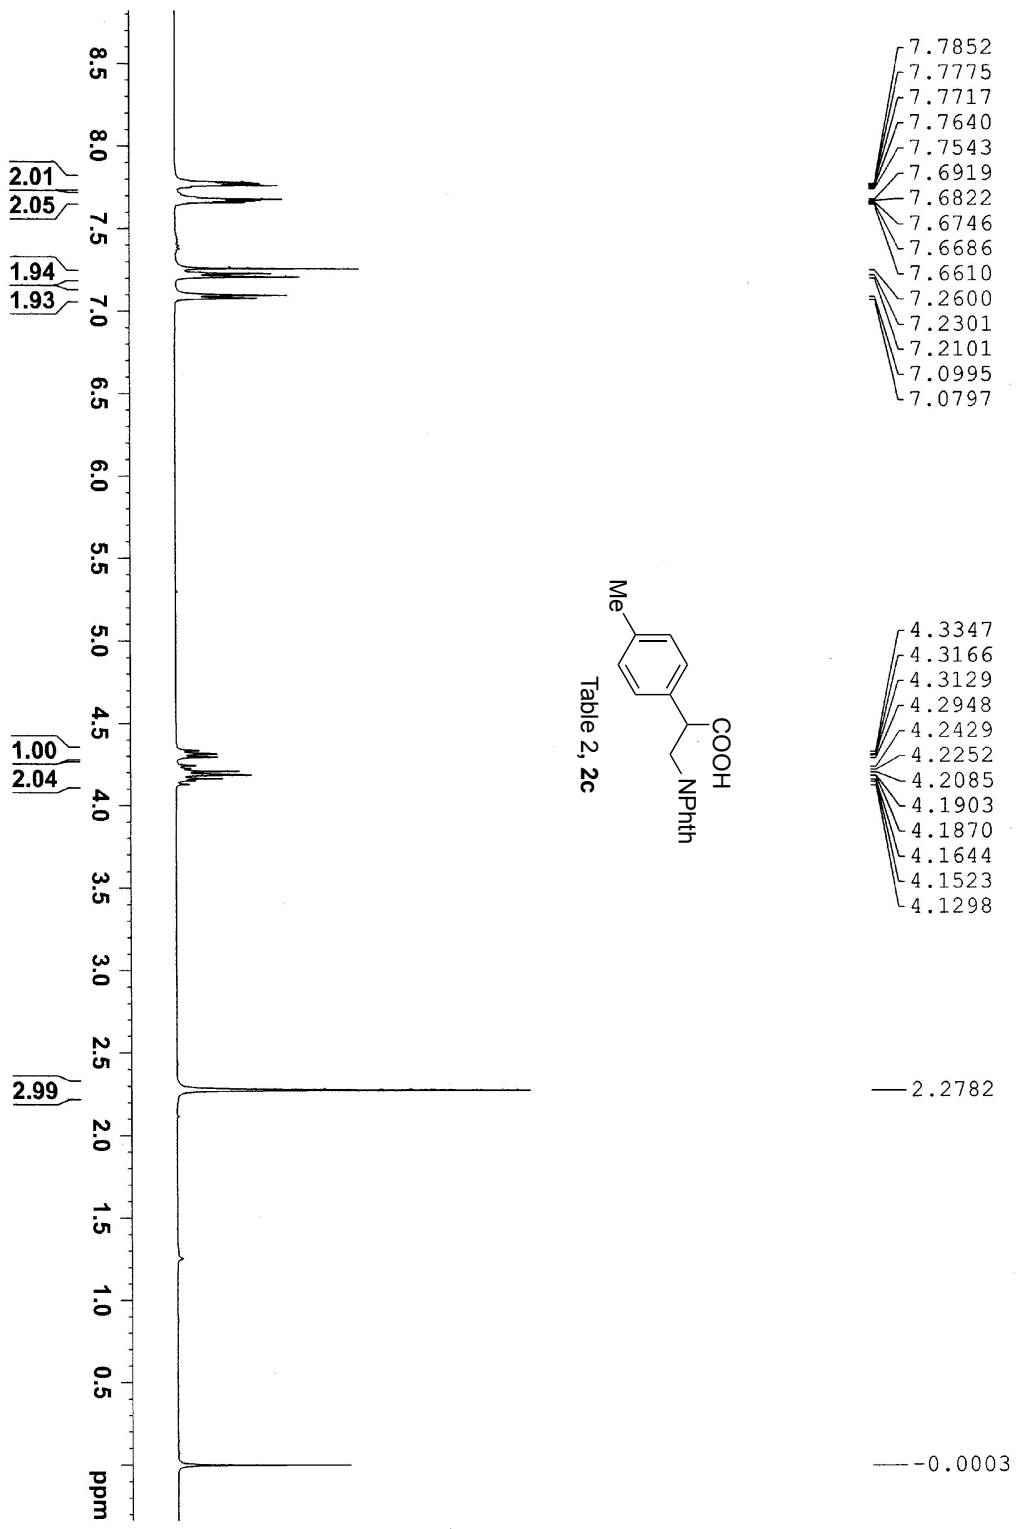



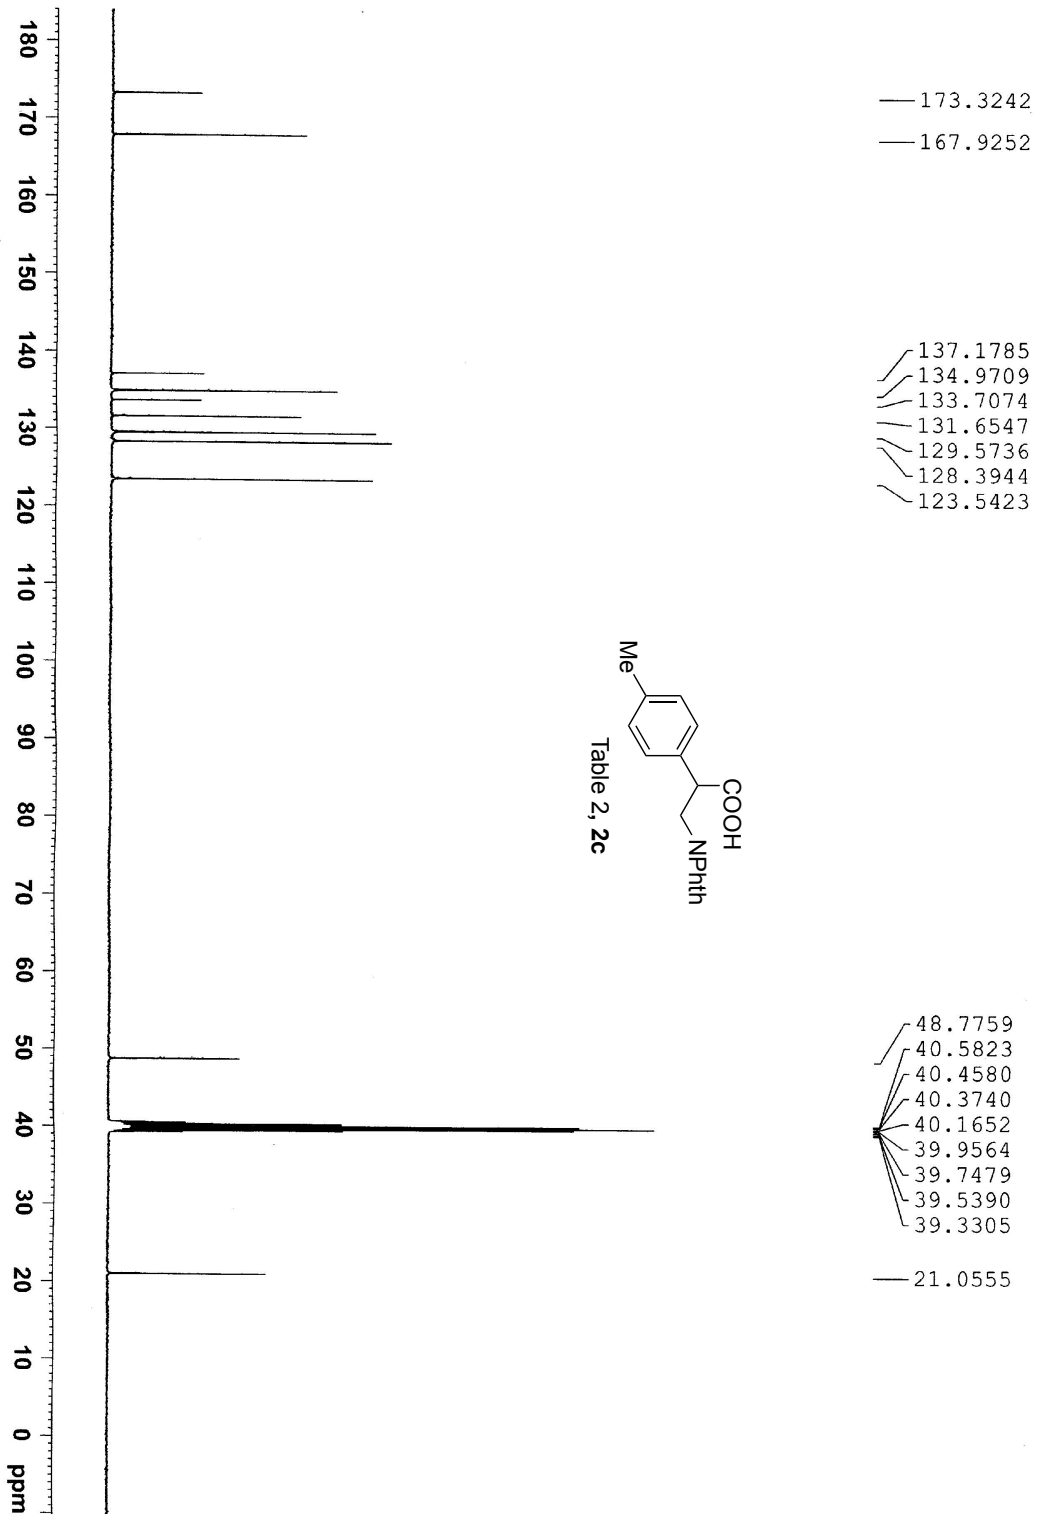

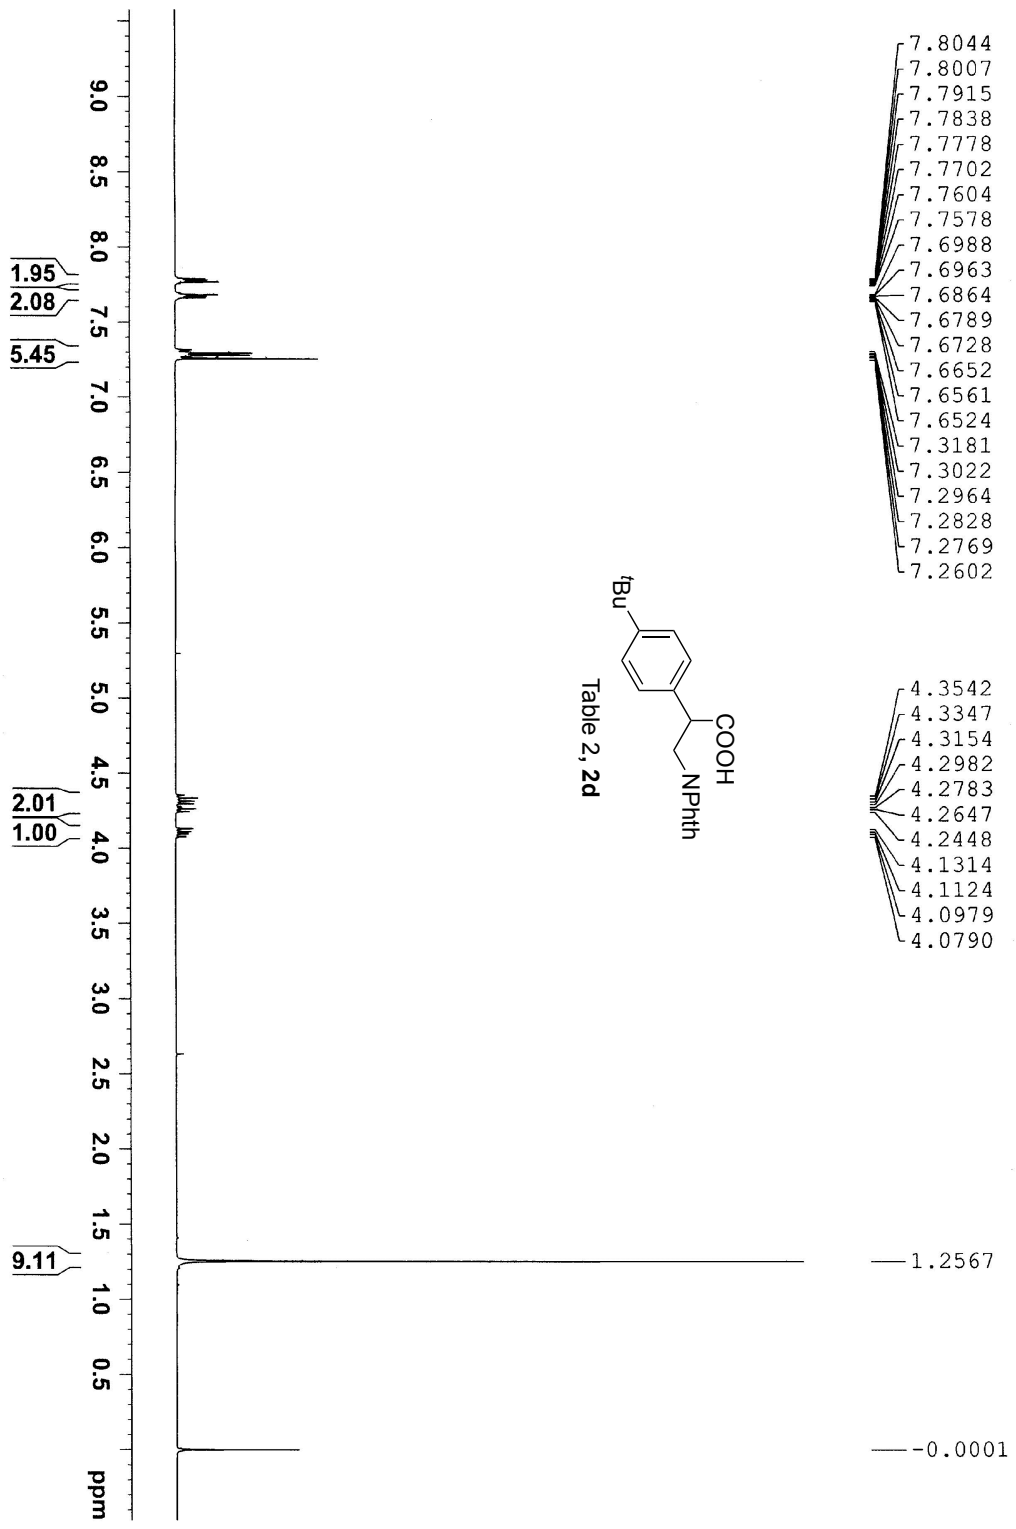

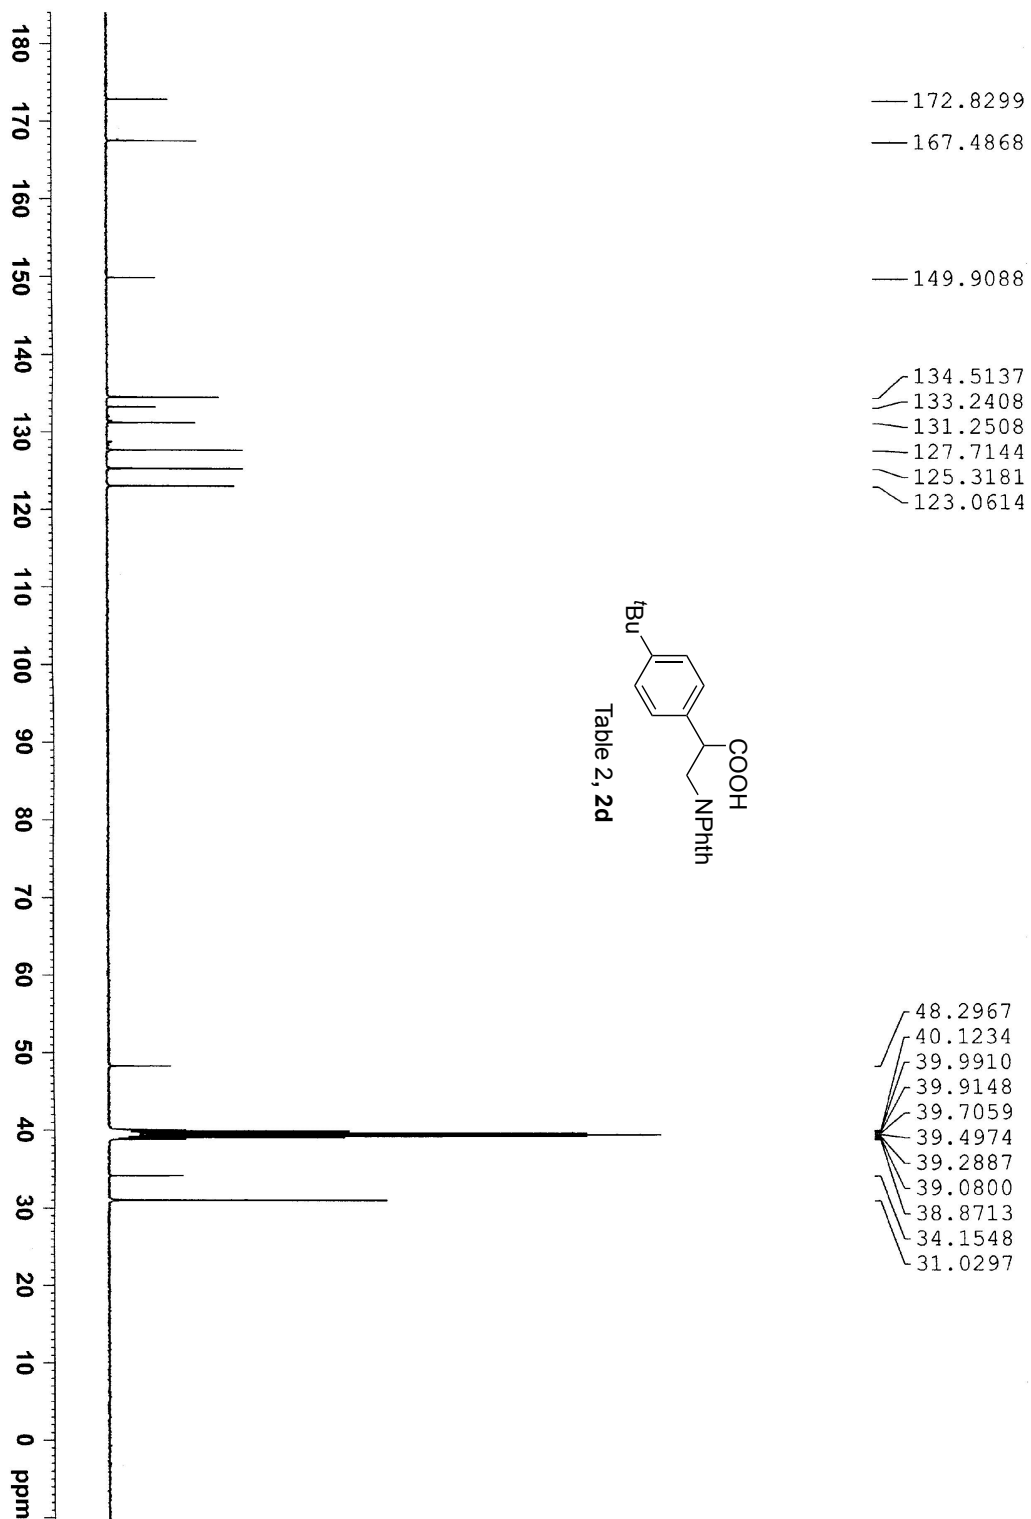

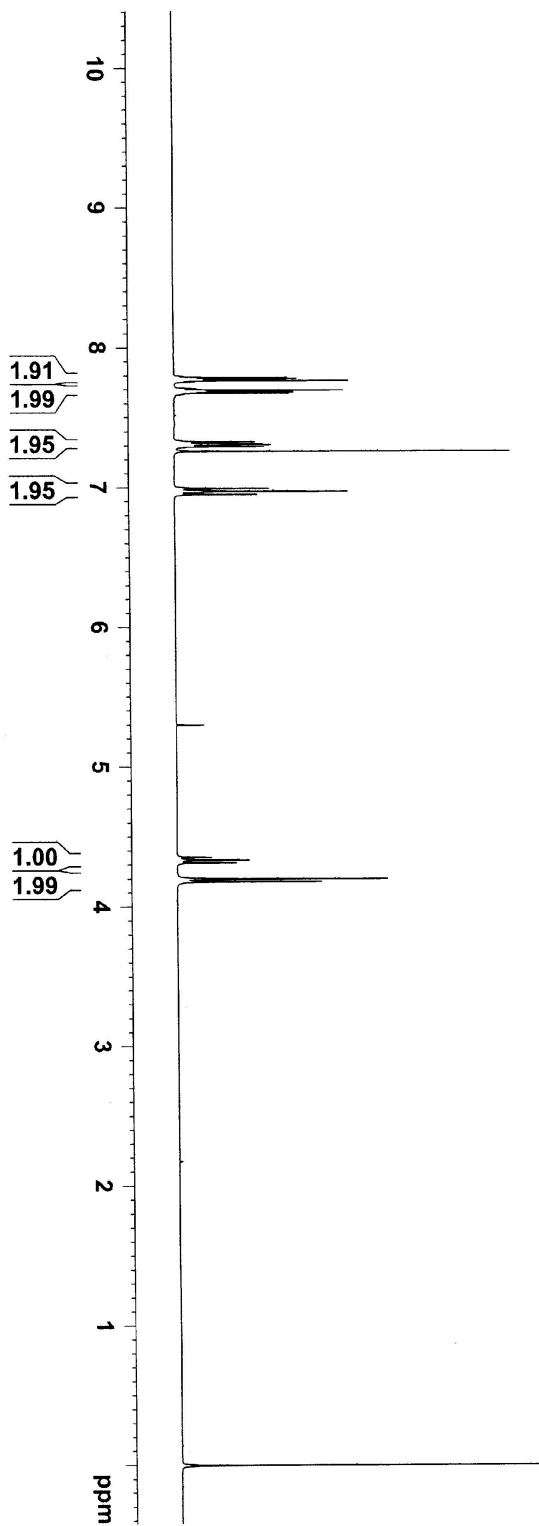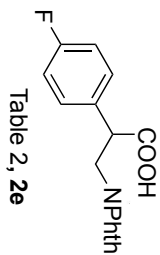

- 7.7962
- 7.7869
- 7.7792
- 7.7729
- 7.7656
- 7.7557
- 7.7533
- 7.7092
- 7.7067
- 7.6968
- 7.6892
- 7.6832
- 7.6755
- 7.6663
- 7.6627
- 7.3363
- 7.3285
- 7.3234
- 7.3155
- 7.3067
- 7.2989
- 7.2937
- 7.2860
- 7.2599
- 7.0023
- 6.9946
- 6.9894
- 6.9777
- 6.9730
- 6.9683
- 6.9565
- 6.9514
- 6.9437
- 4.3546
- 4.3335
- 4.3142
- 4.1999
- 4.1797

---0.0032

210 200 190 180 170 160 150 140 130 120 110 100 90 80 70 60 50 40 30 20 10 0 ppm

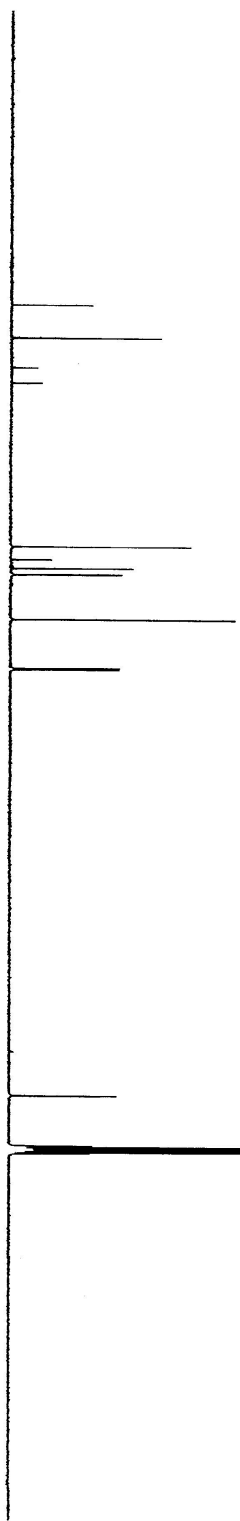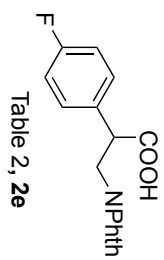

172.6320  
167.4341  
162.7169  
160.2962

134.5614  
132.5506  
132.5211  
131.1751  
130.2309  
130.1495  
123.1225  
115.4323  
115.2199

48.0356  
40.1289  
40.0462  
39.9205  
39.7116  
39.5030  
39.2944  
39.0855  
38.8767

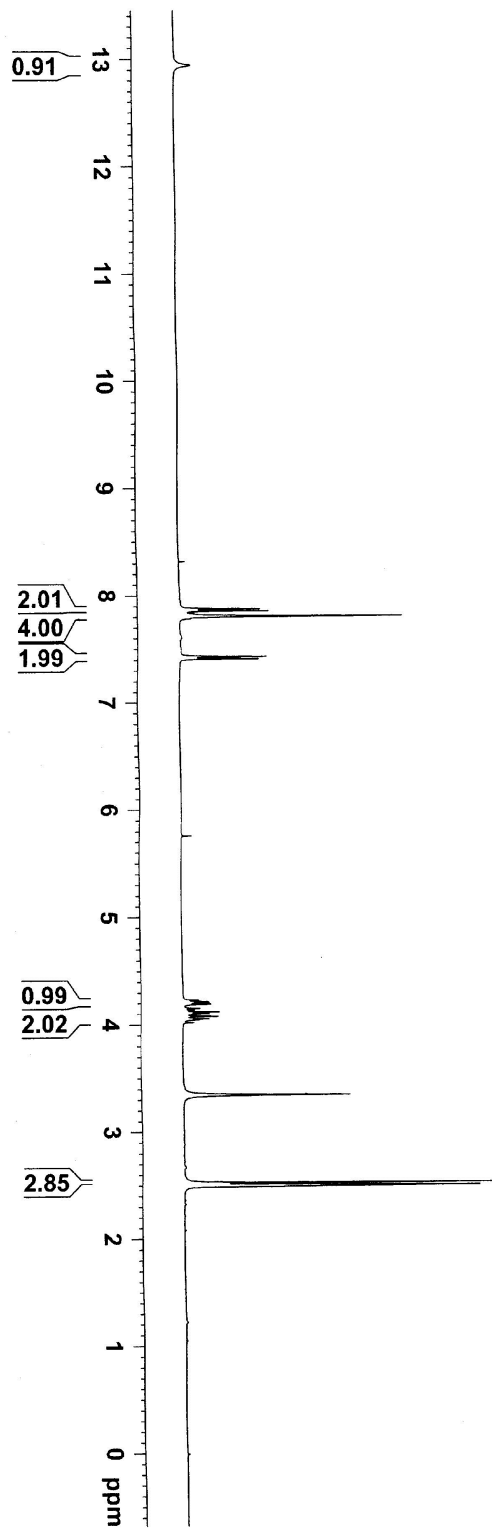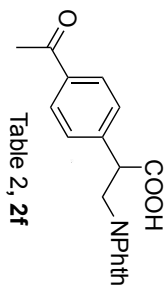

— 12.9435

7.8790  
7.8585  
7.8099  
7.7877  
7.4339  
7.4133

4.2322  
4.2159  
4.2092  
4.1929  
4.1529  
4.1367  
4.1184  
4.1022  
4.0802  
4.0568  
4.0457  
4.0222  
3.3464  
2.5250  
2.5000

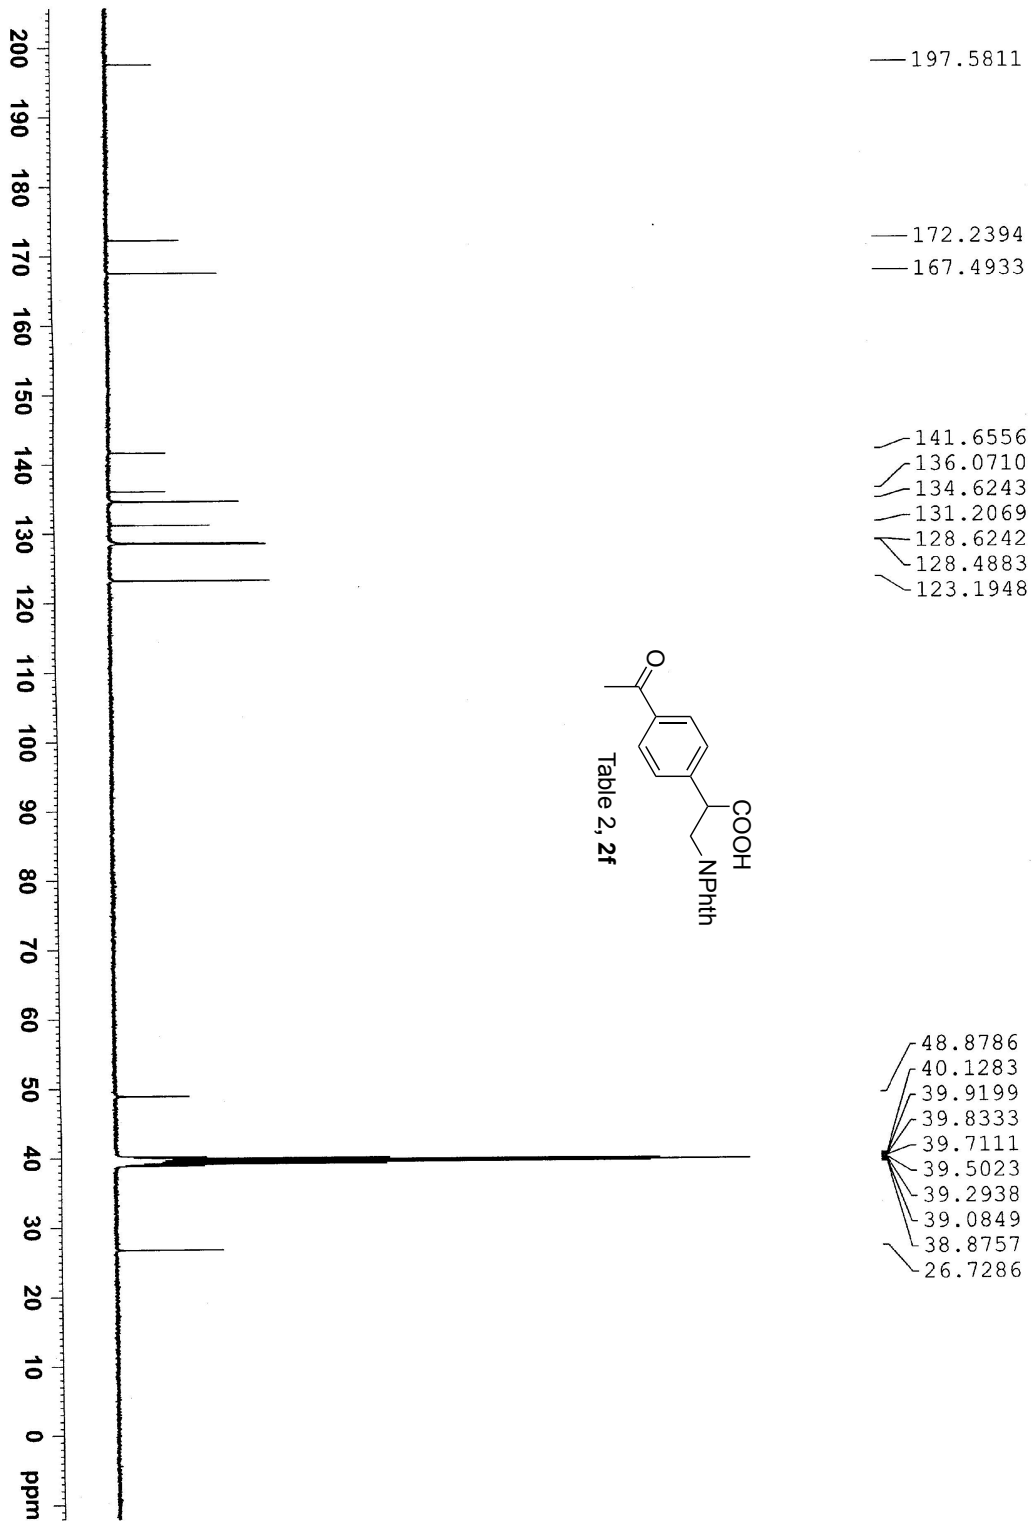

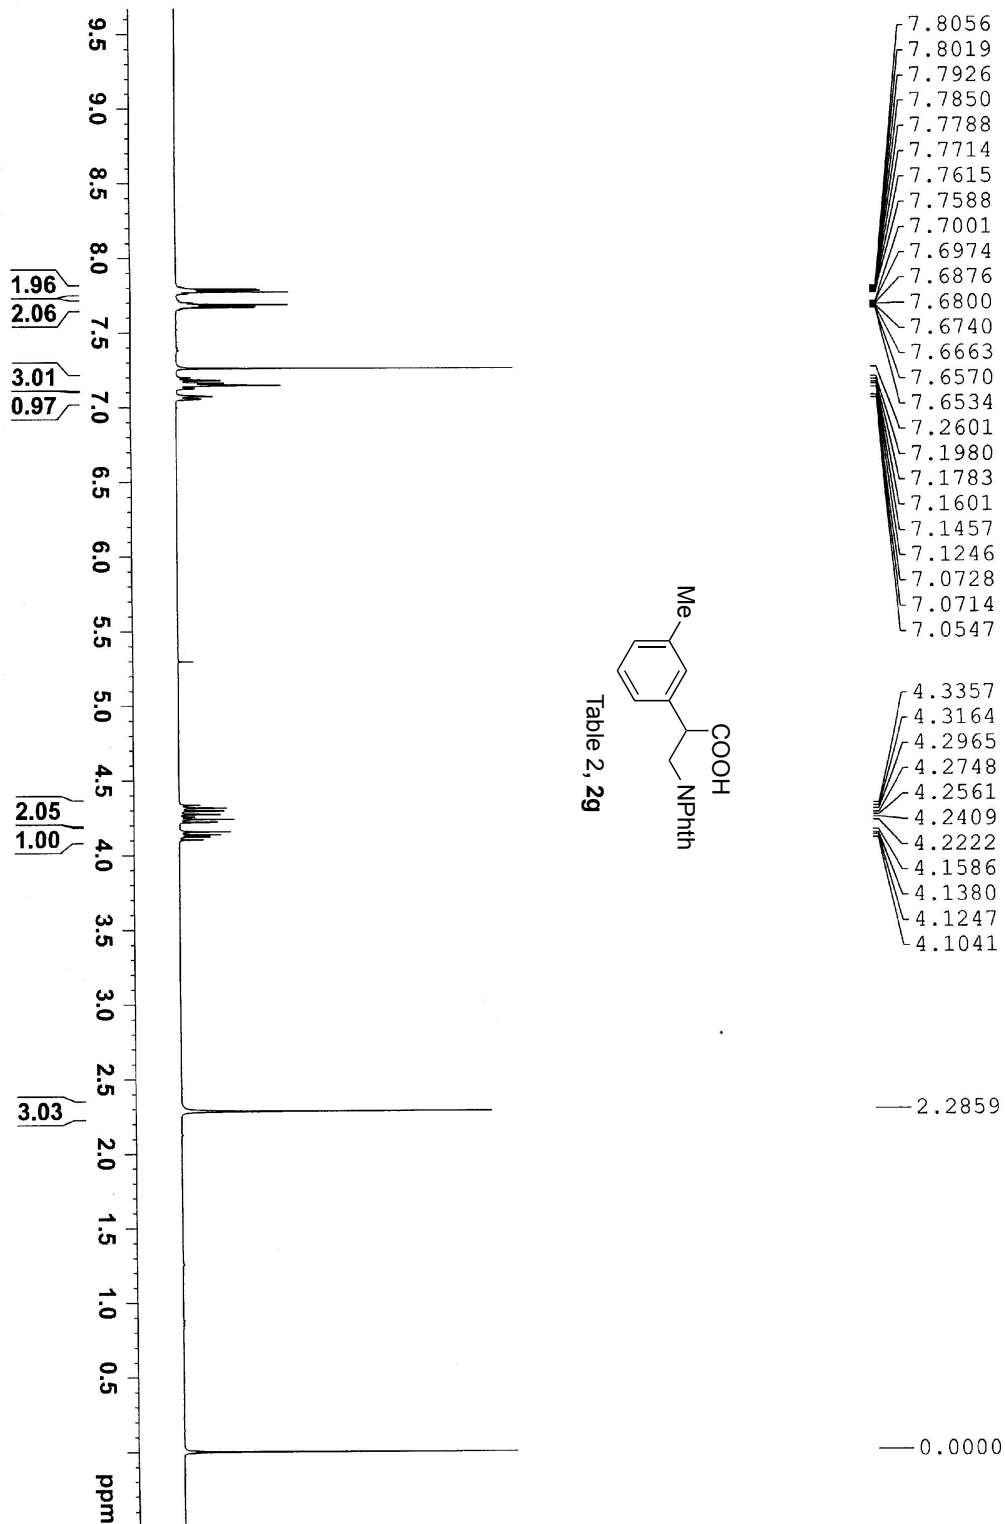



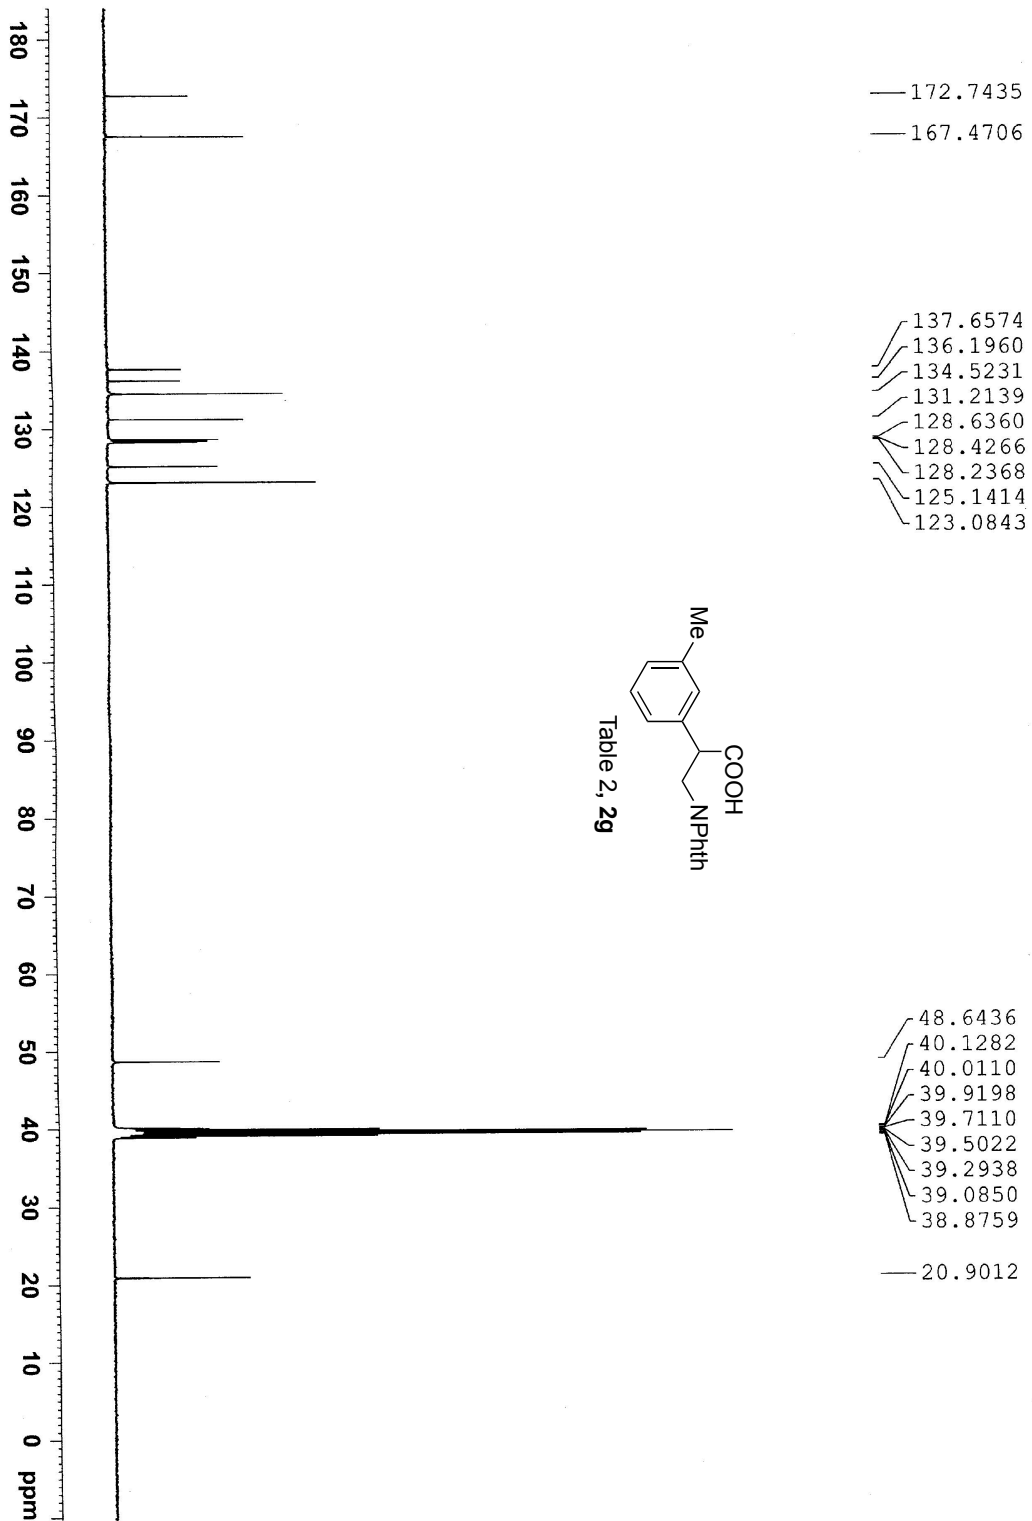

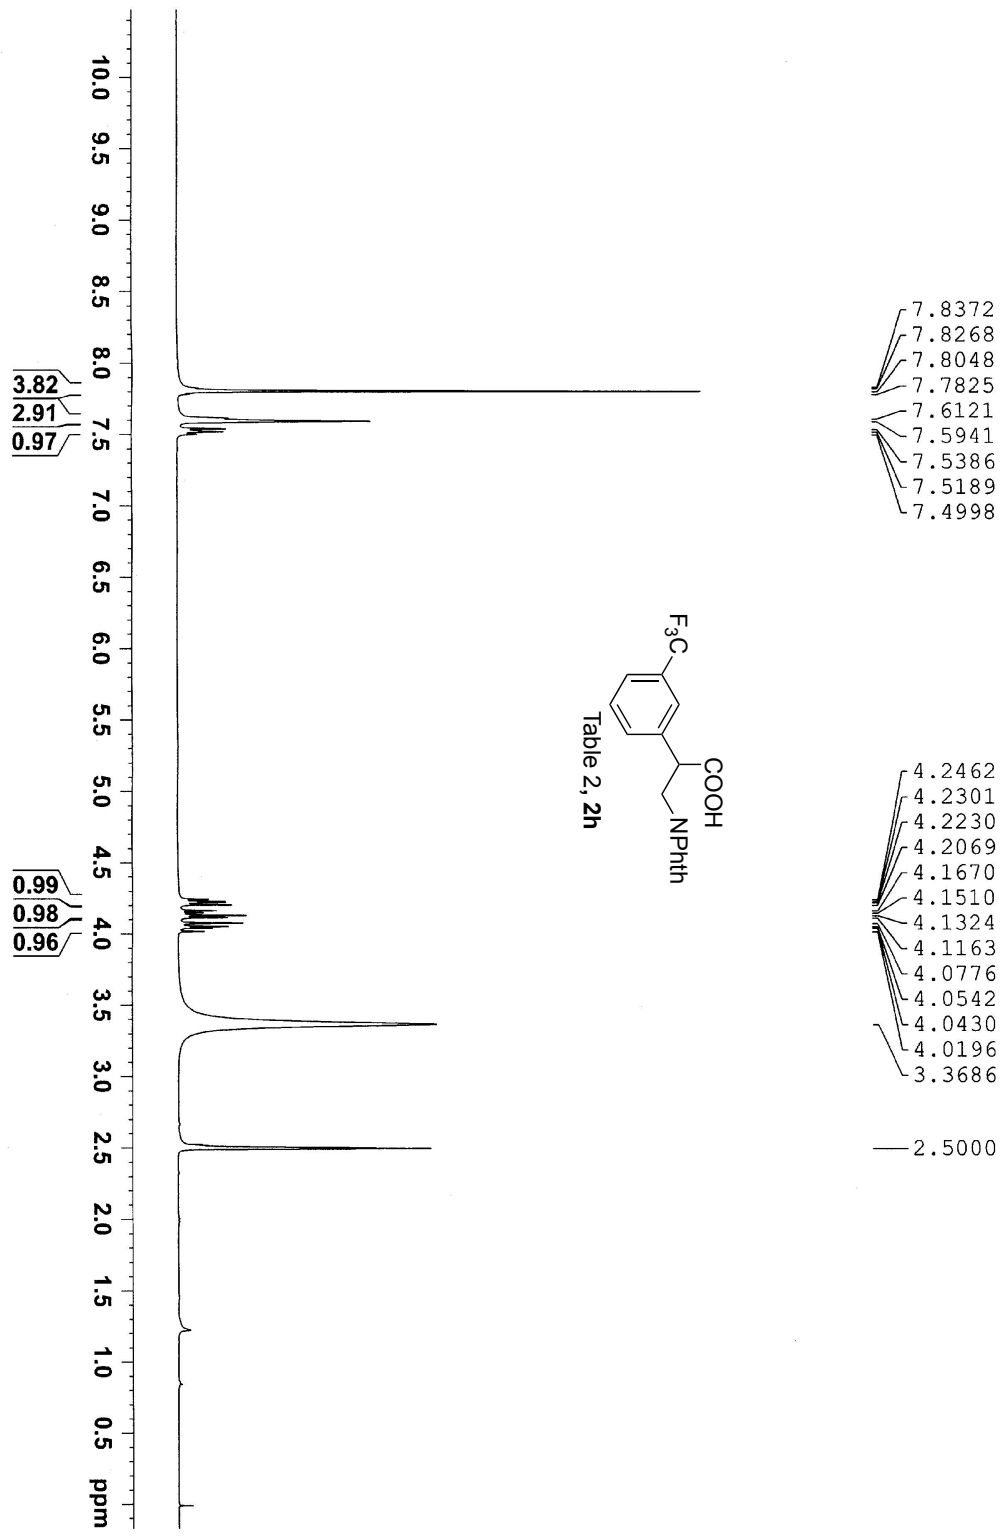

180 170 160 150 140 130 120 110 100 90 80 70 60 50 40 30 20 10 0 ppm

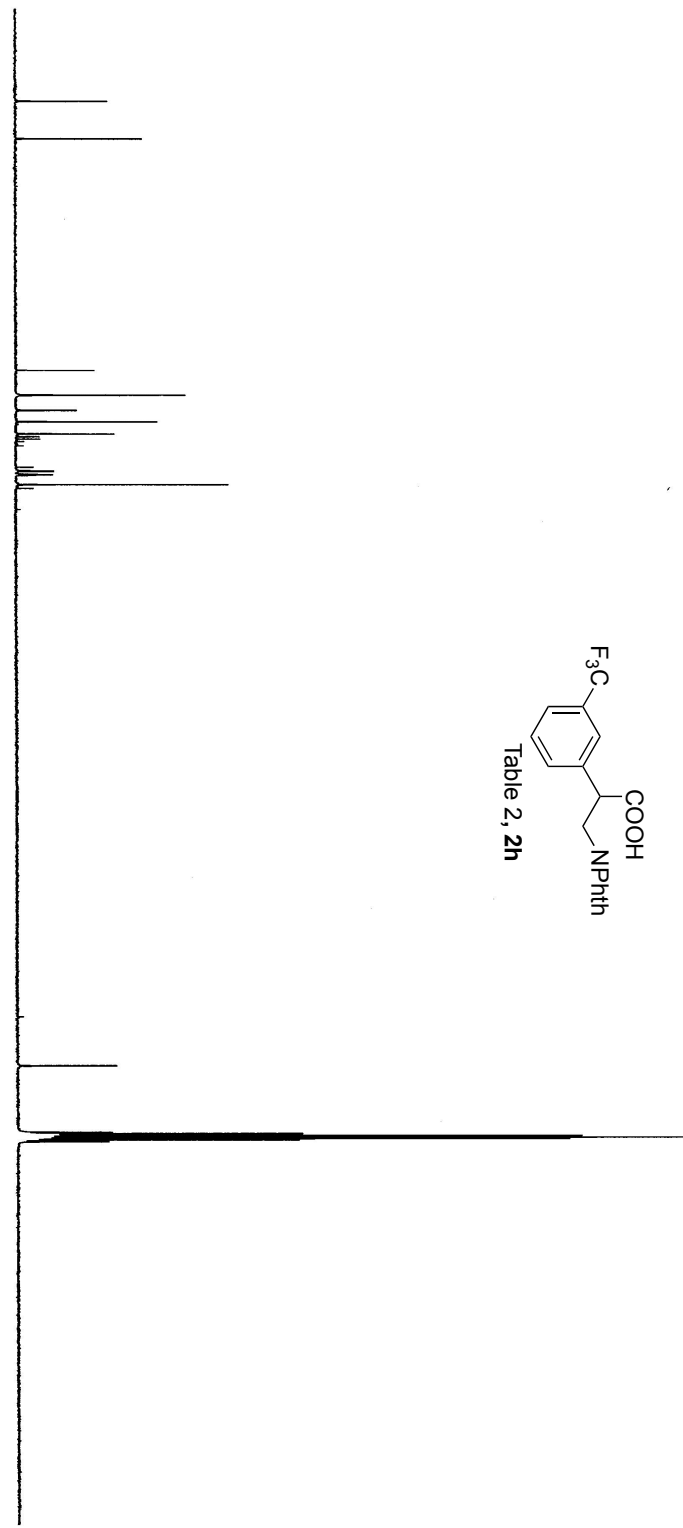

— 172.2316  
— 167.4072

137.7622  
134.5783  
132.6261  
131.1641  
129.6190  
129.2703  
128.9556  
128.6416  
128.0803  
125.3738  
124.8741  
124.8374  
124.4054  
124.3692  
123.1157  
122.6660  
119.9589

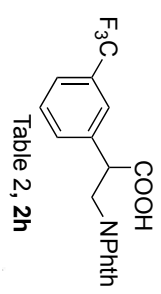

48.6207  
40.1272  
39.9184  
39.8471  
39.7101  
39.5012  
39.2926  
39.0839  
38.8748

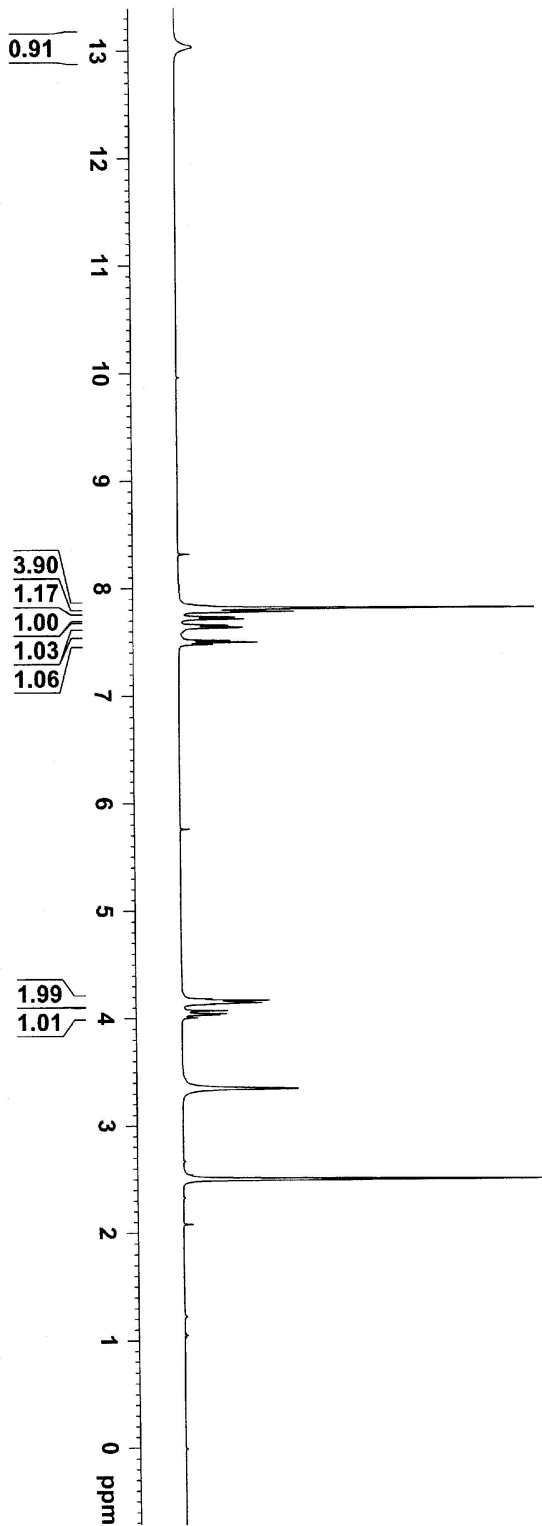

Table 2, 2i

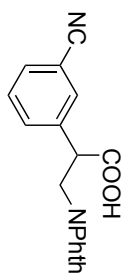

— 13.0359

7.8159  
7.7849  
7.7343  
7.7151  
7.6563  
7.6366  
7.5171  
7.4976  
7.4782

4.1837  
4.1685  
4.1557  
4.1463  
4.1314  
4.0722  
4.0446  
4.0344  
4.0067  
3.3487

— 2.5000

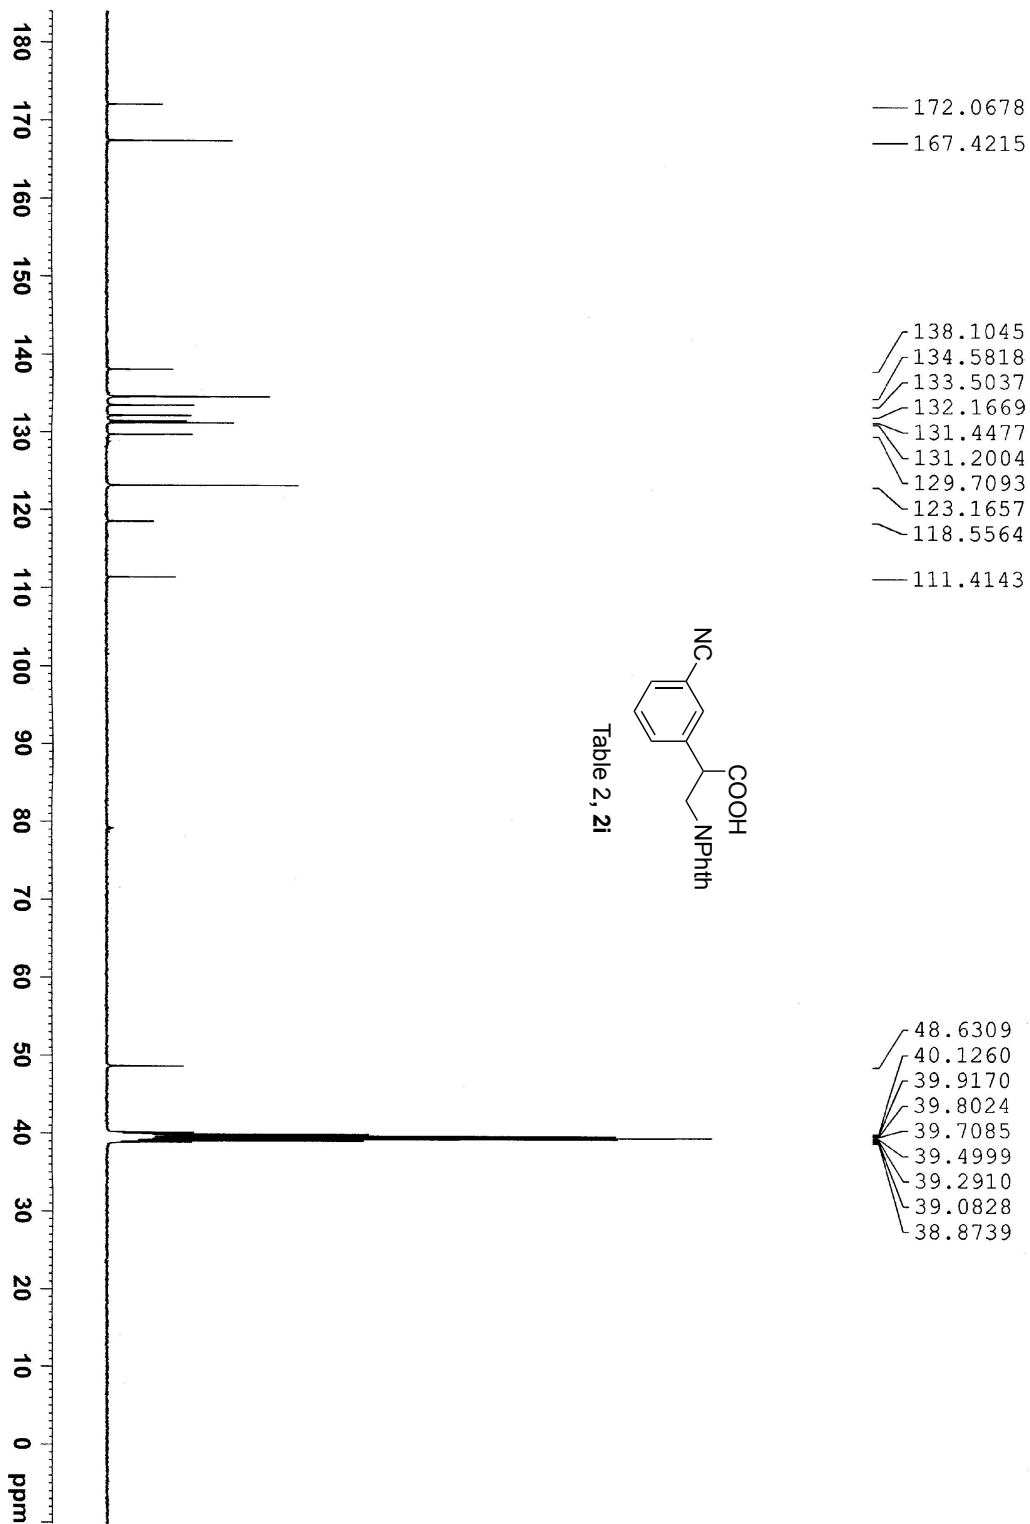

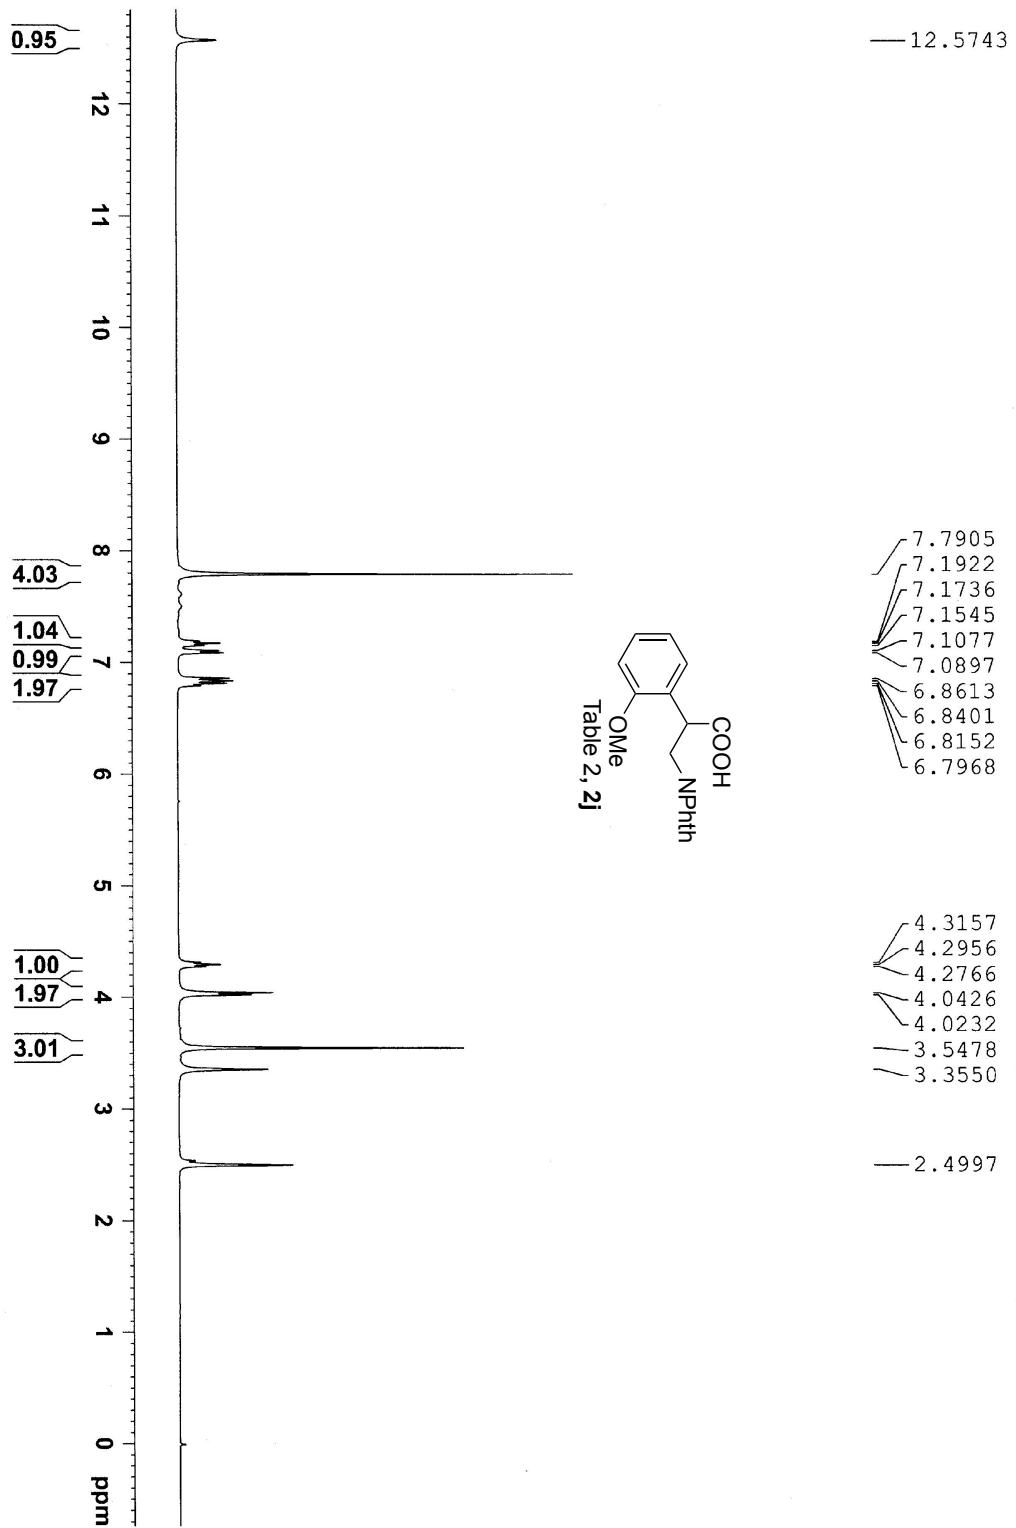

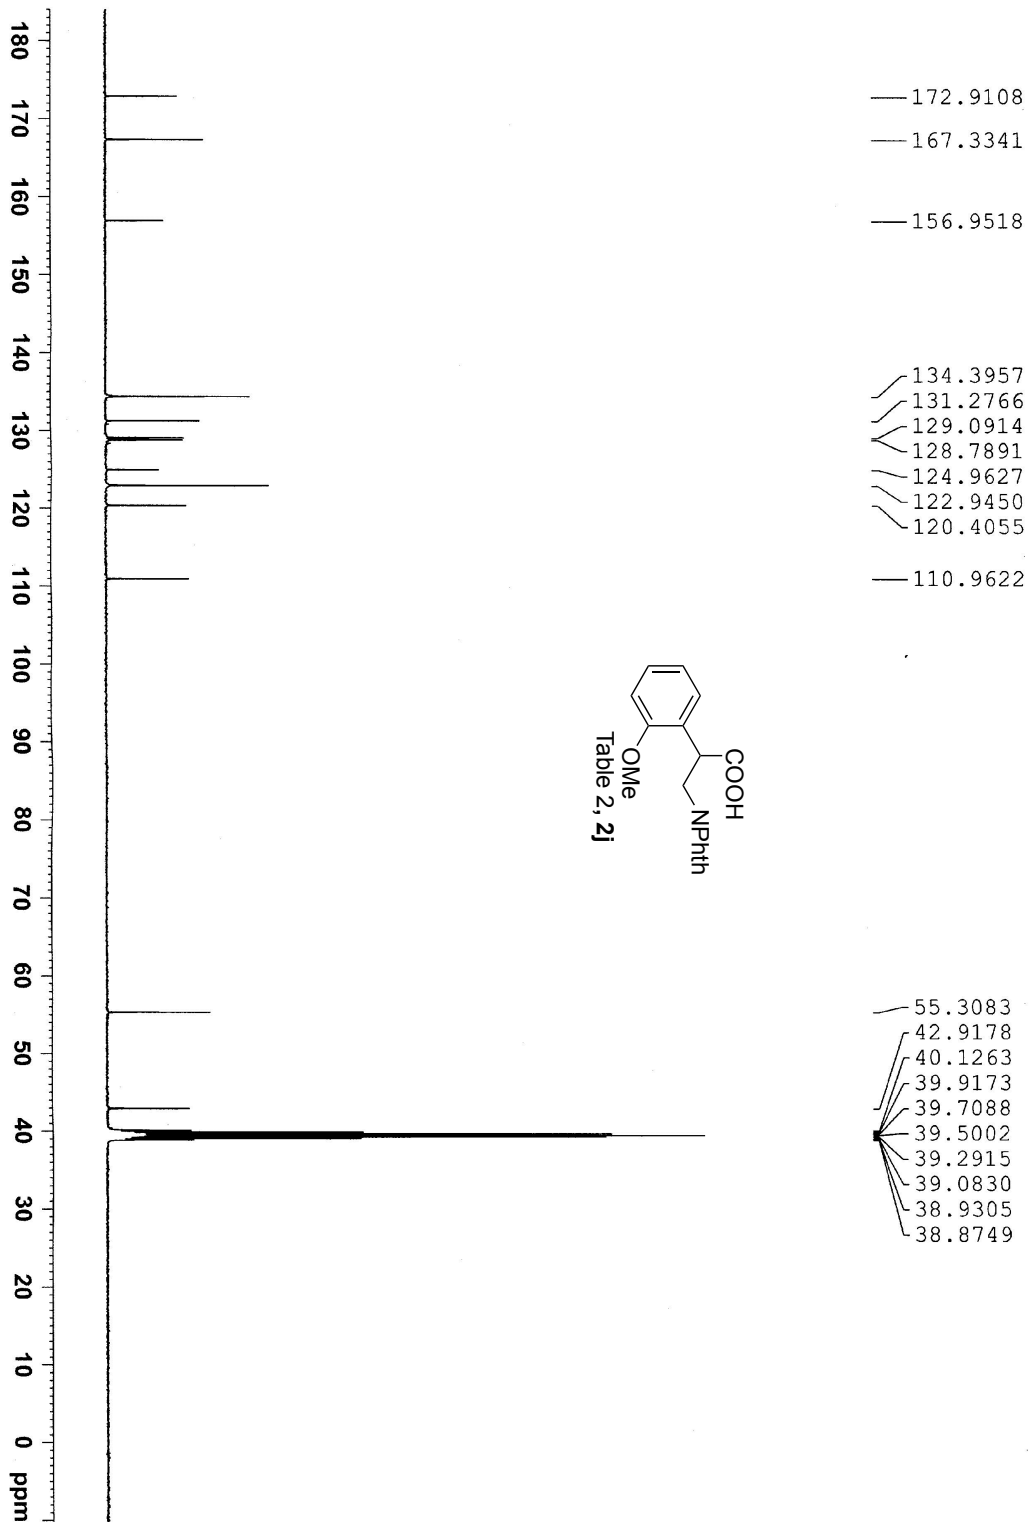

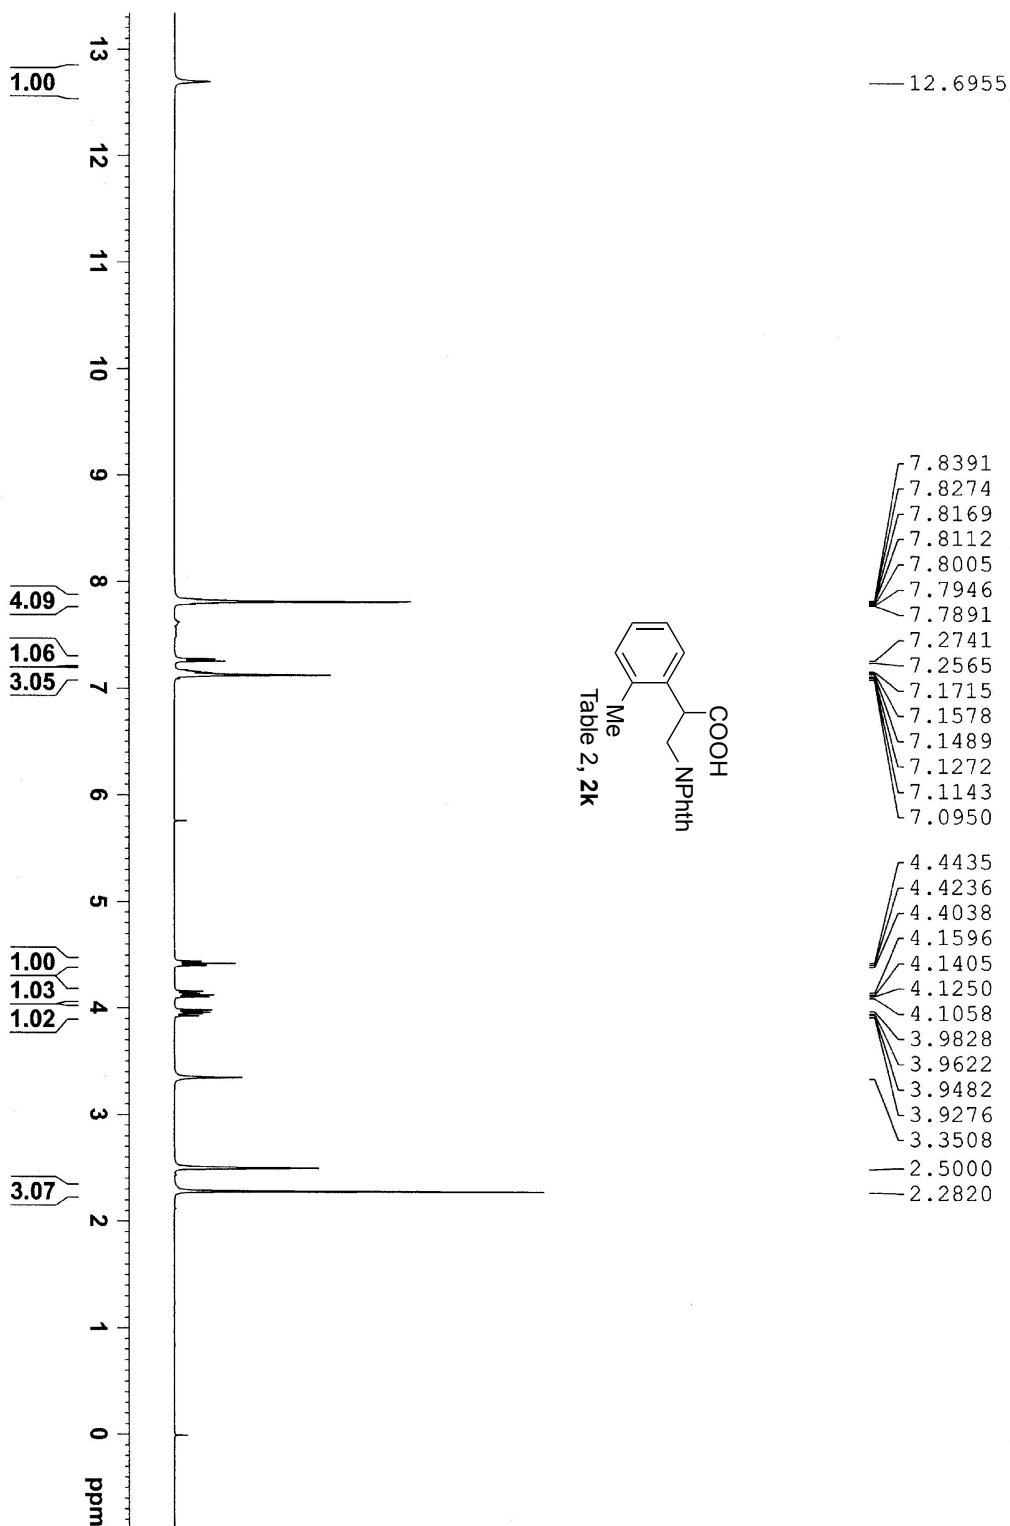



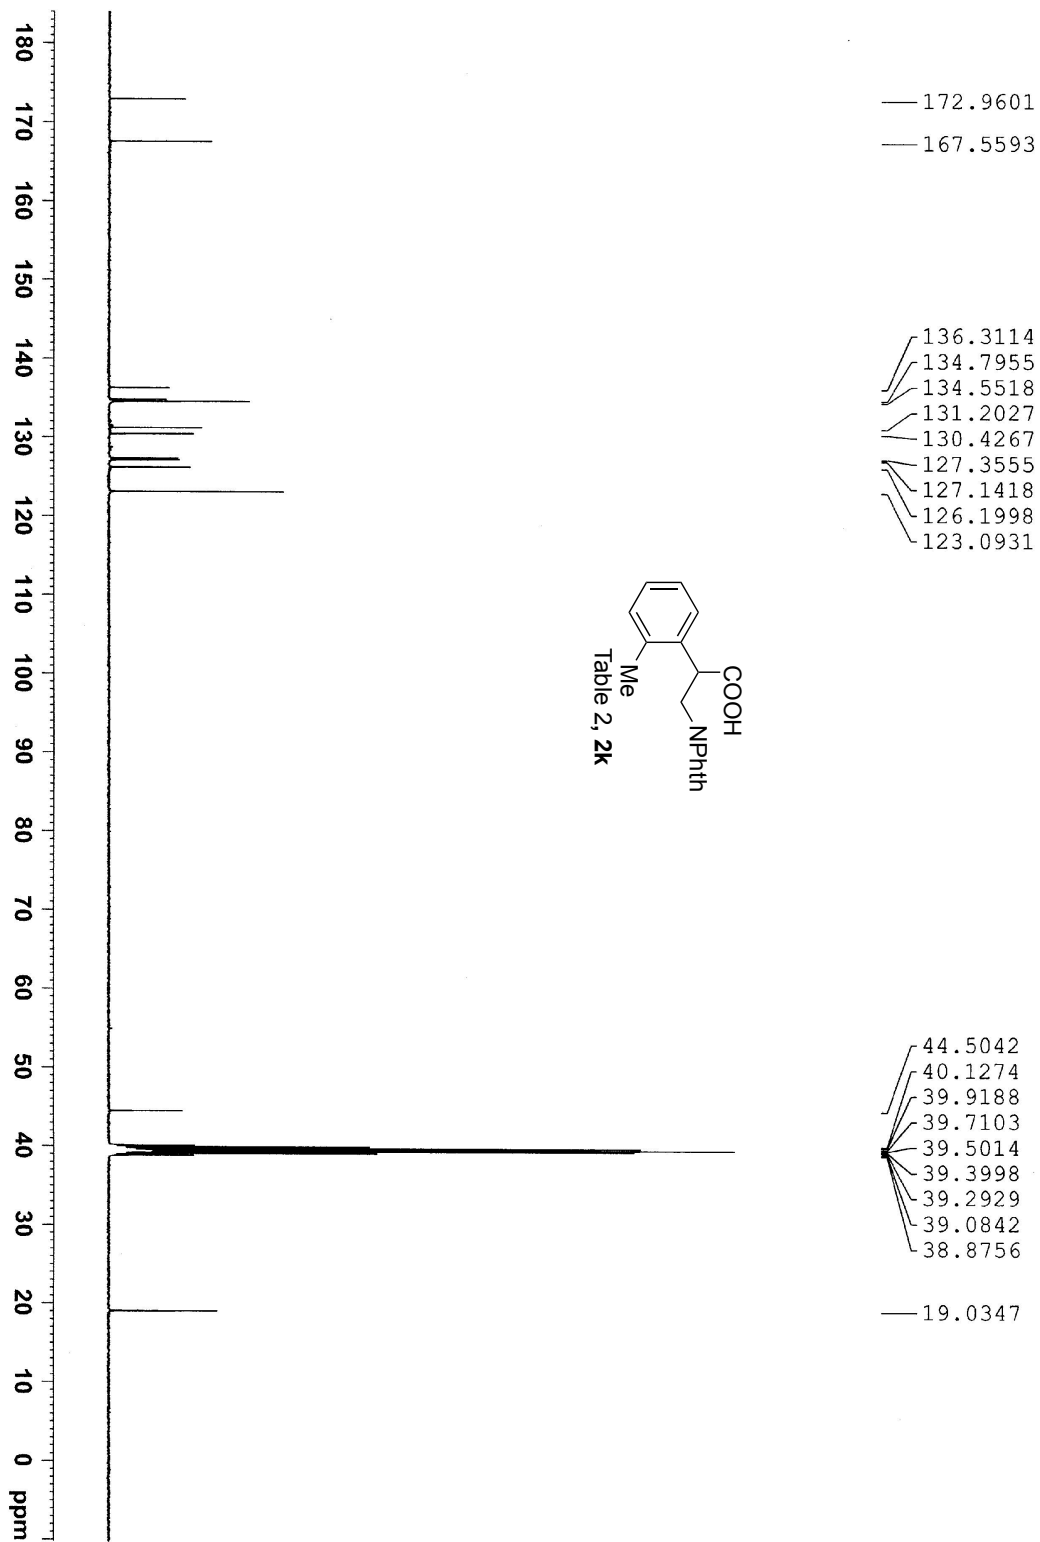

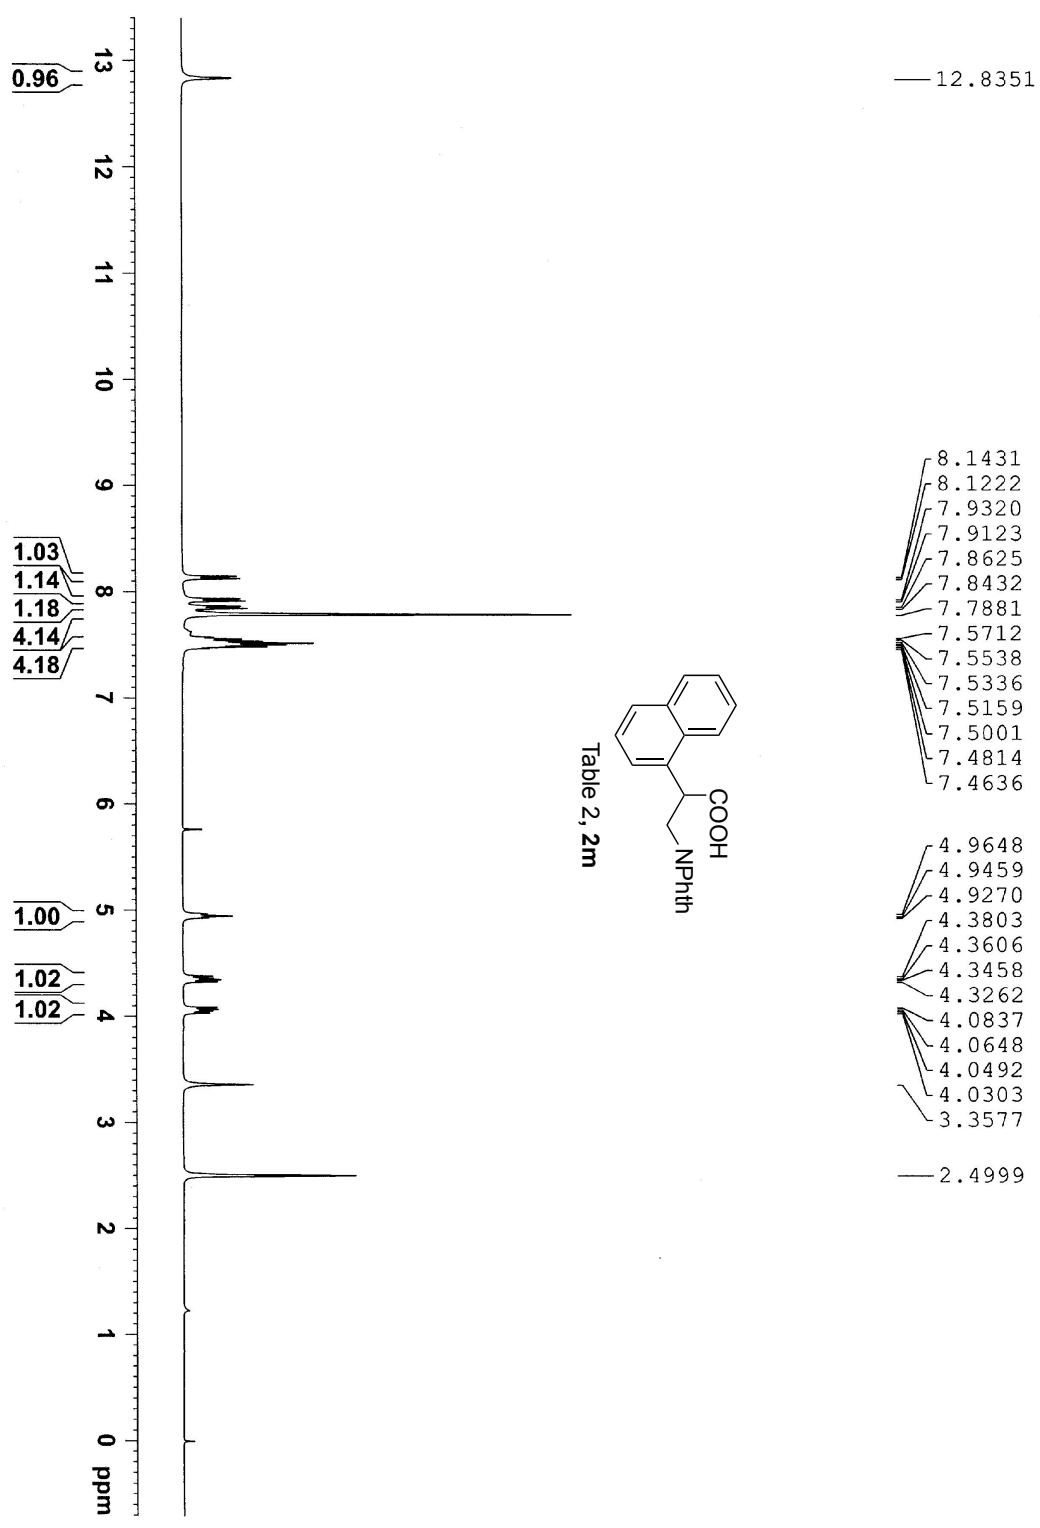

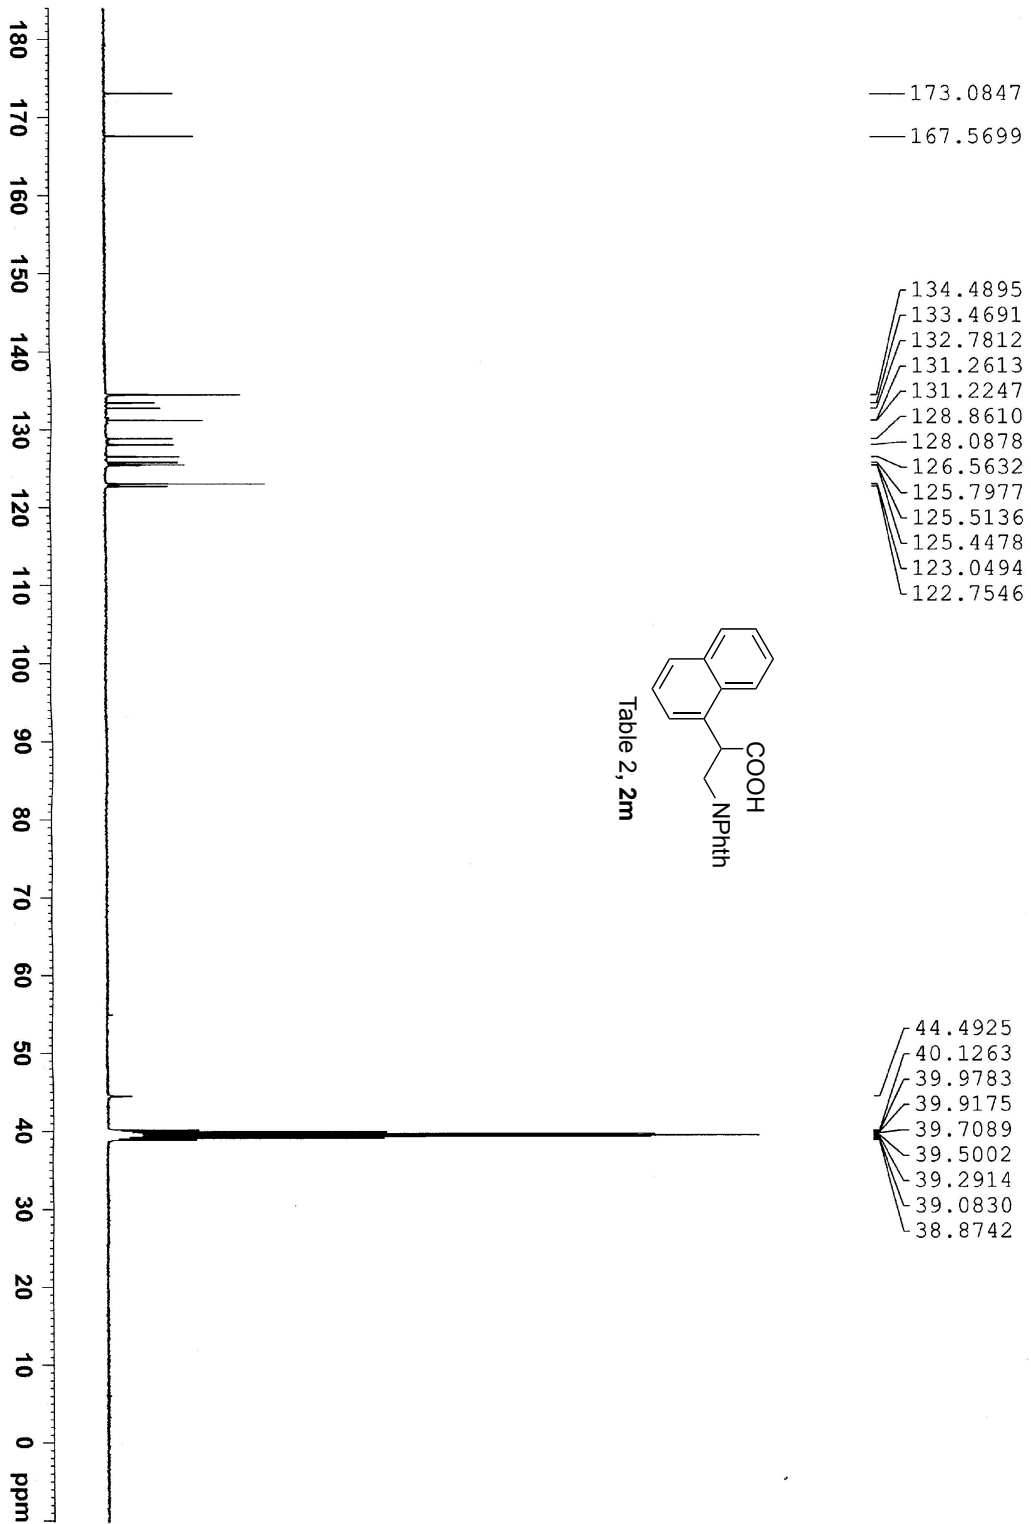

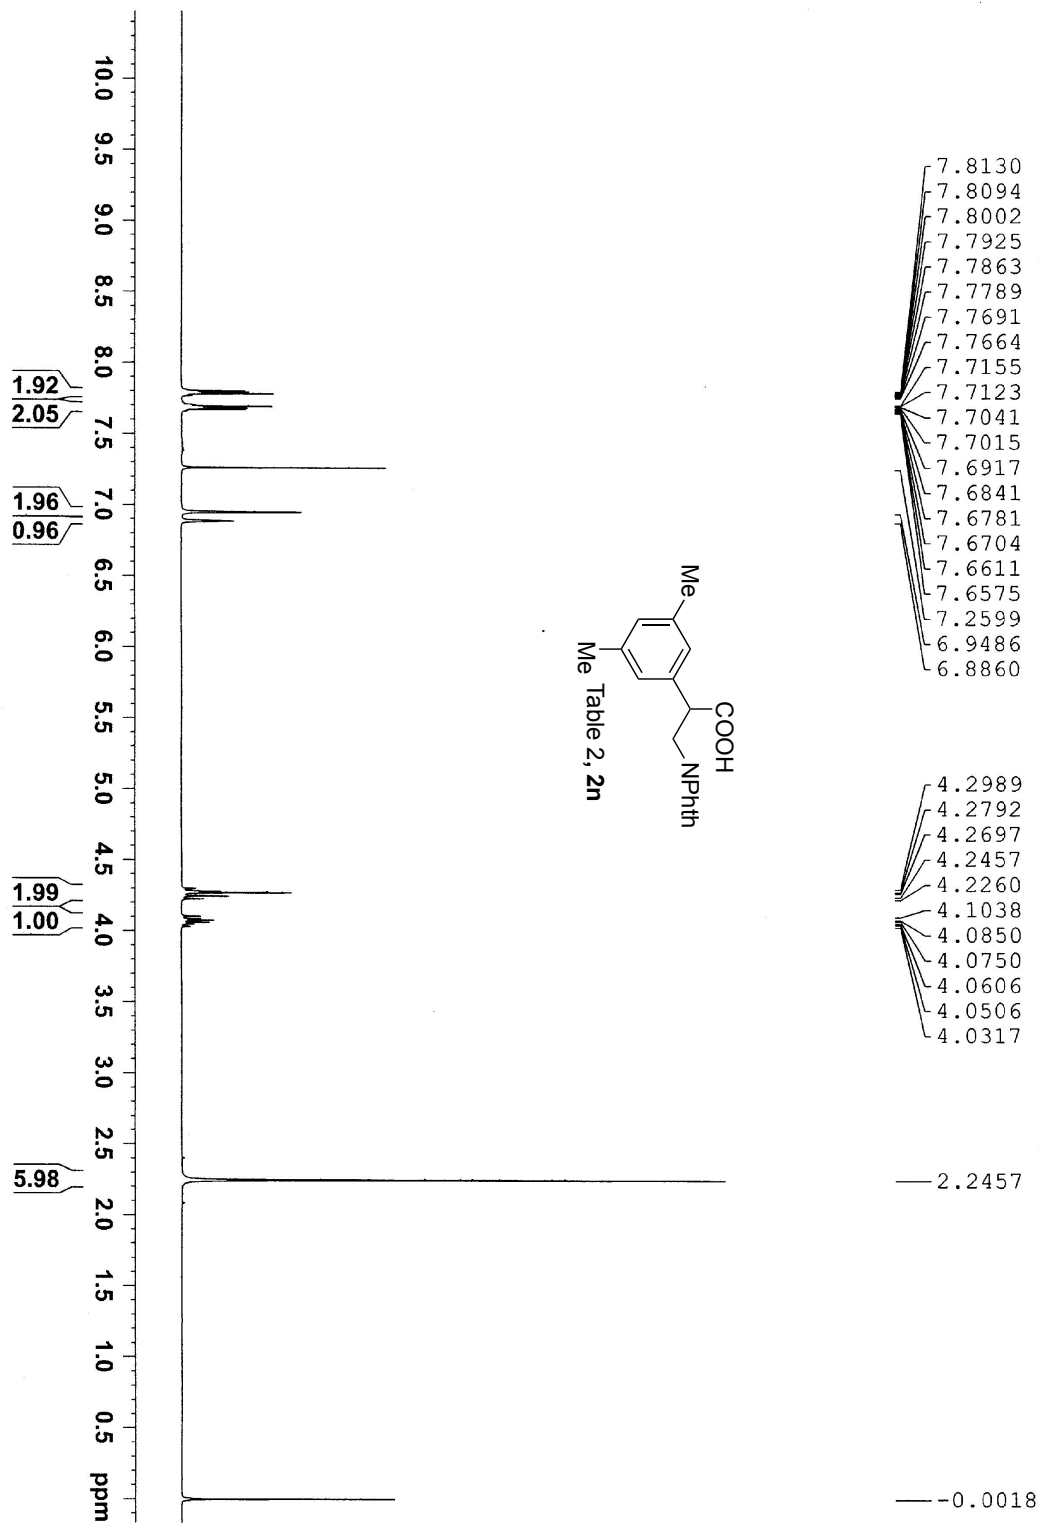

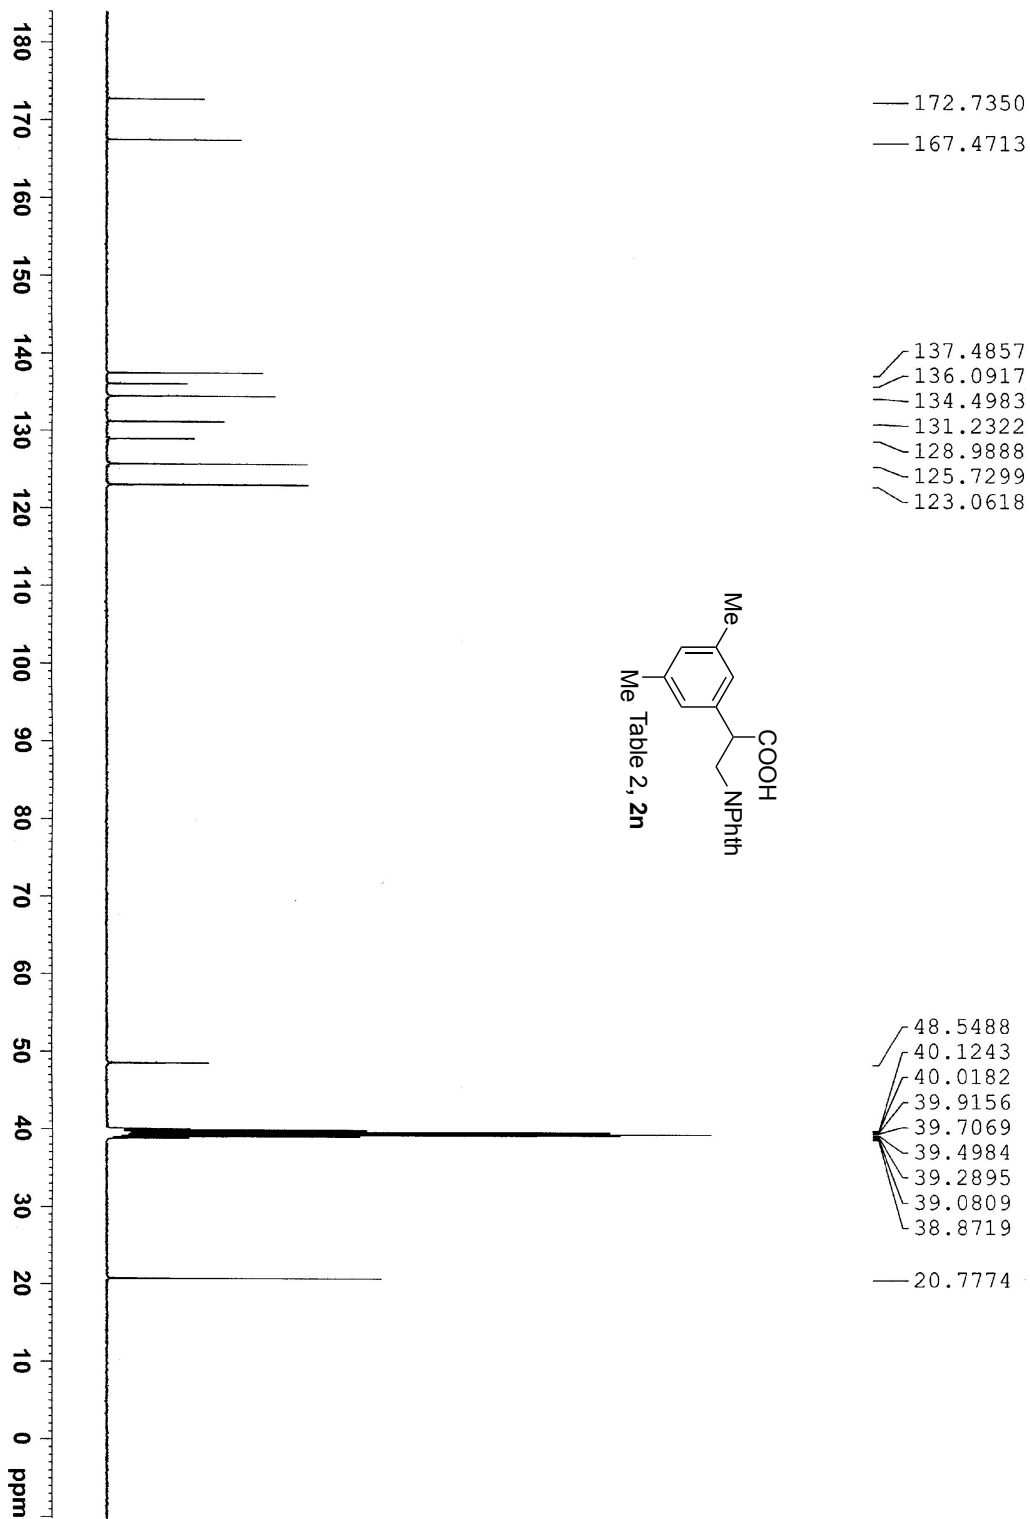

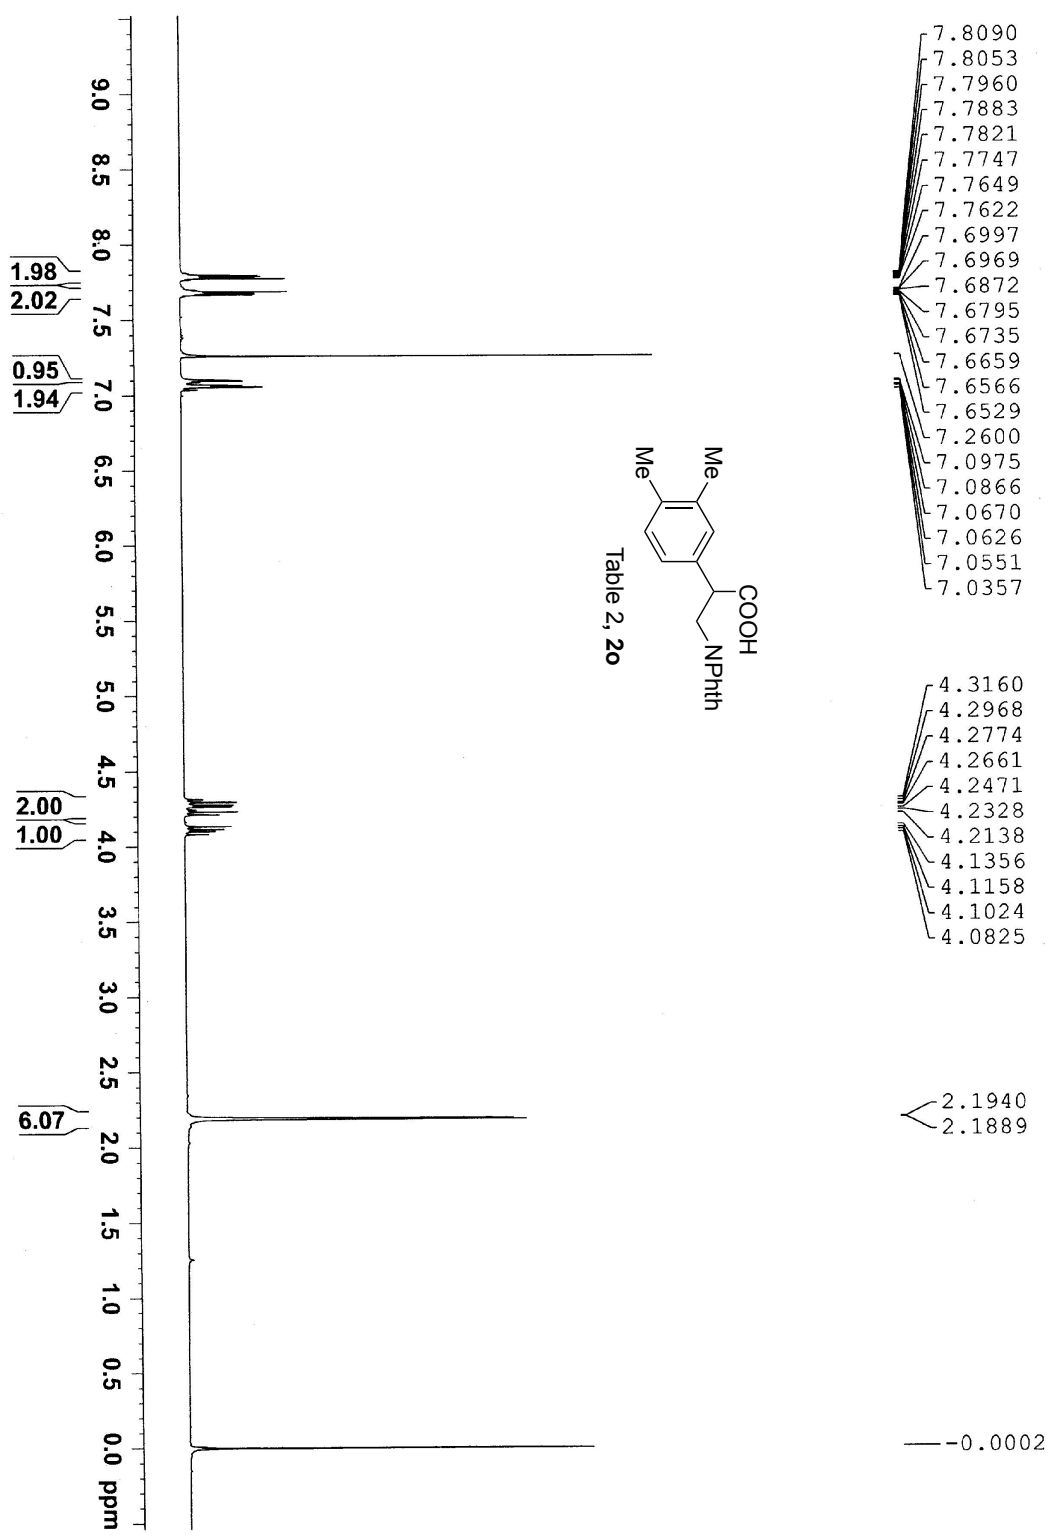

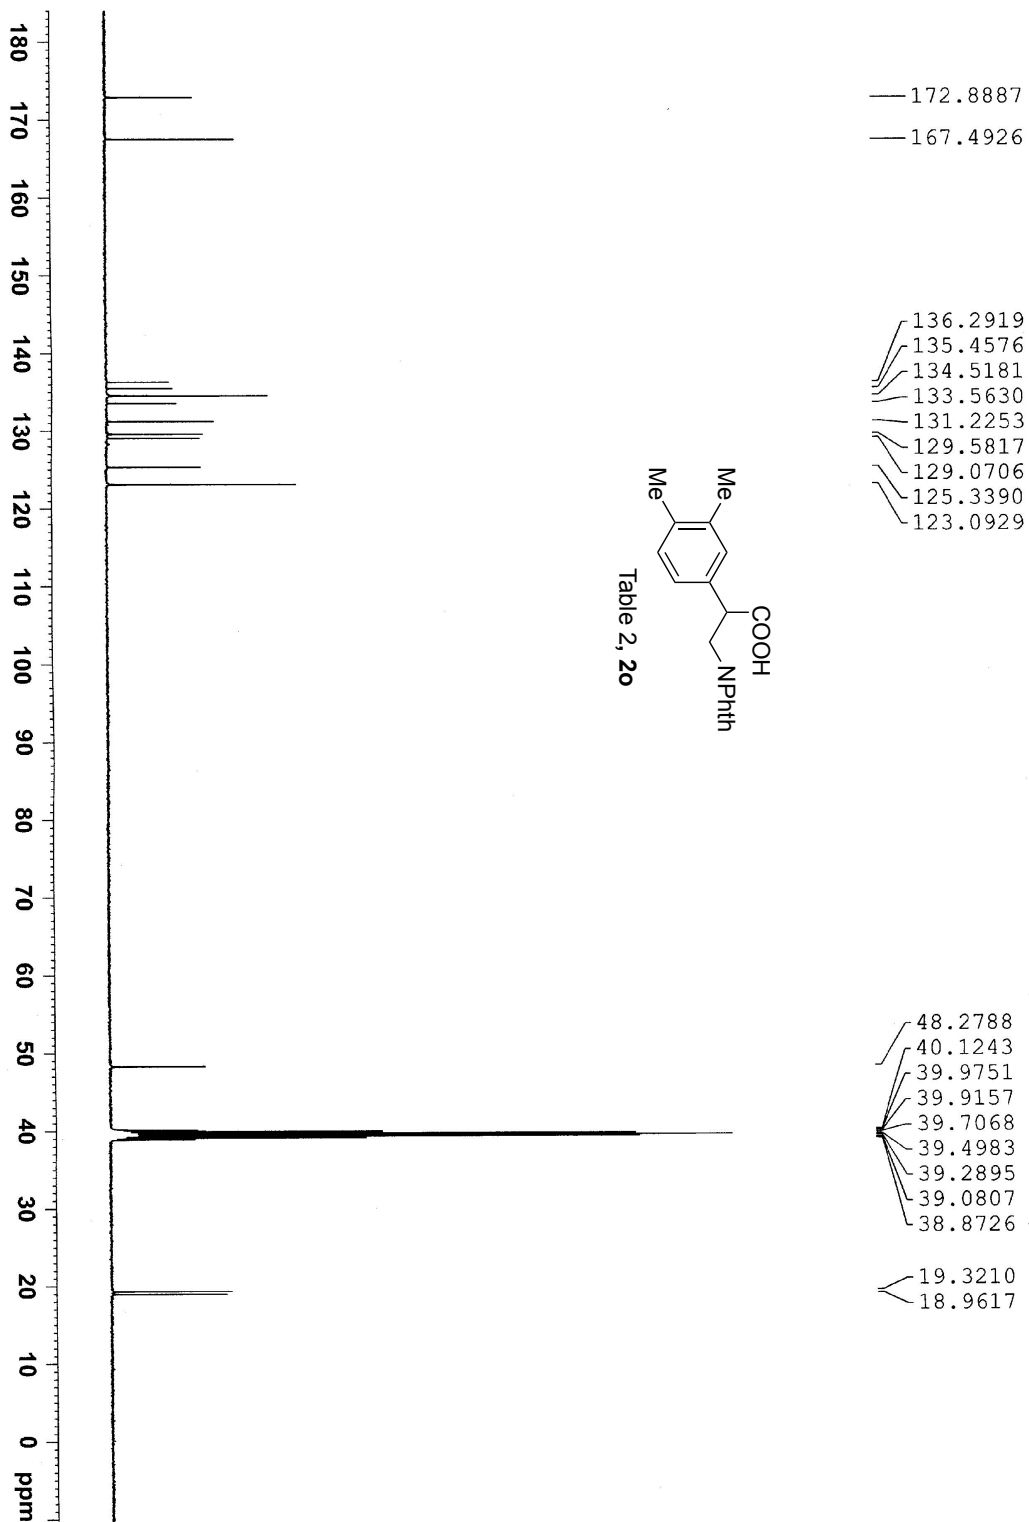

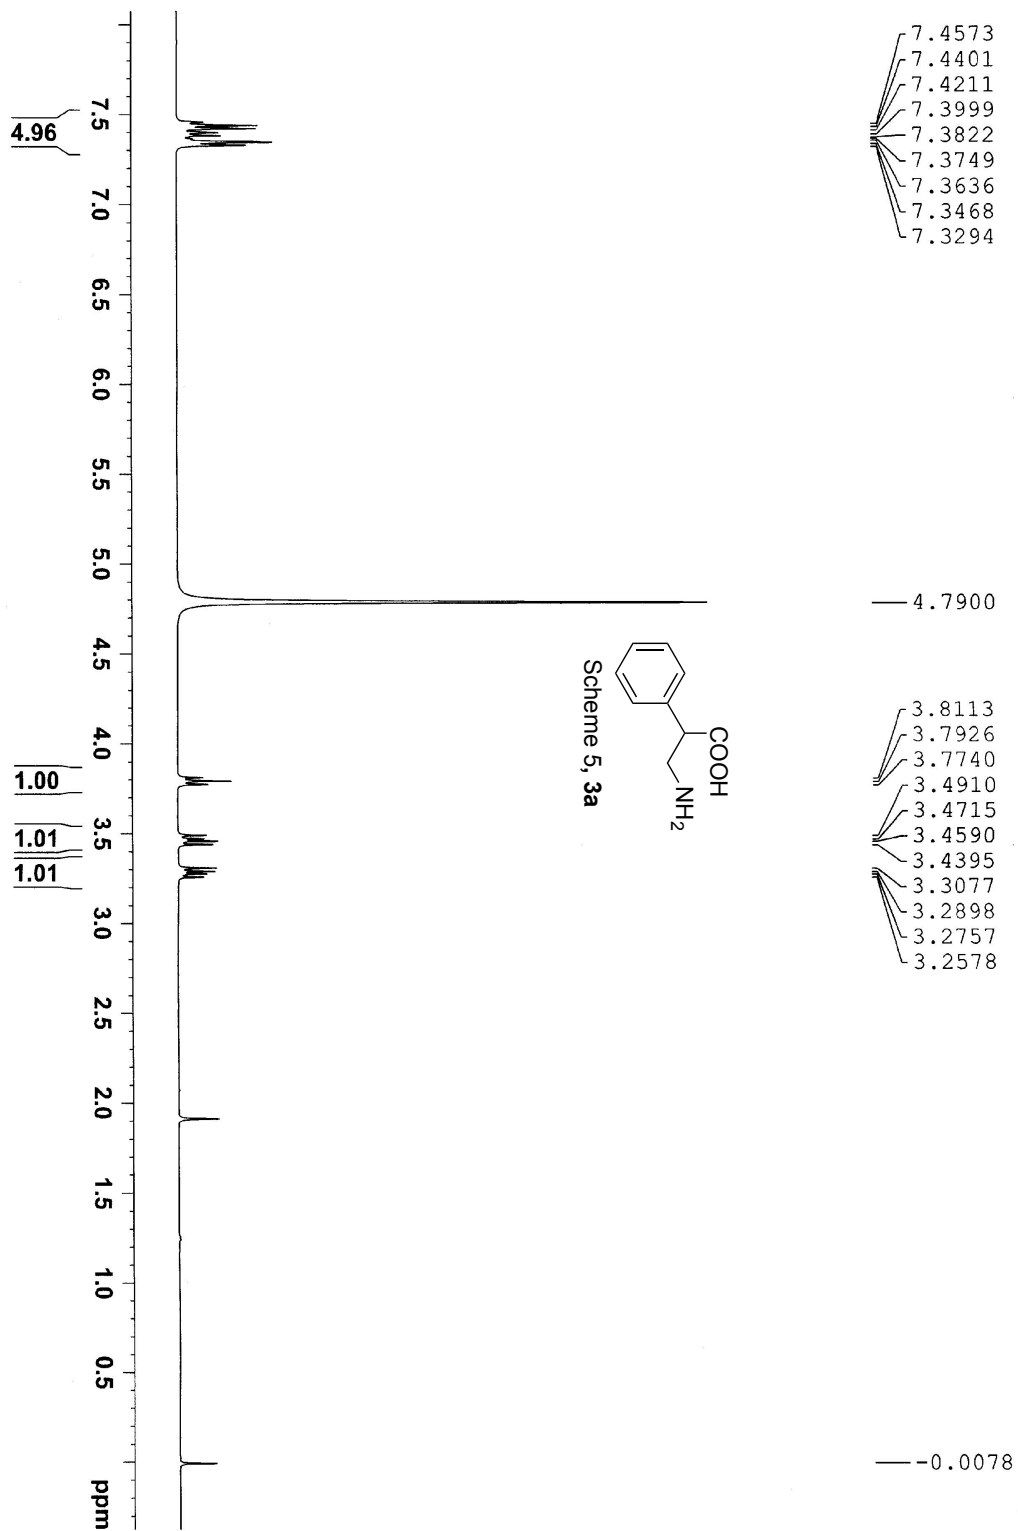



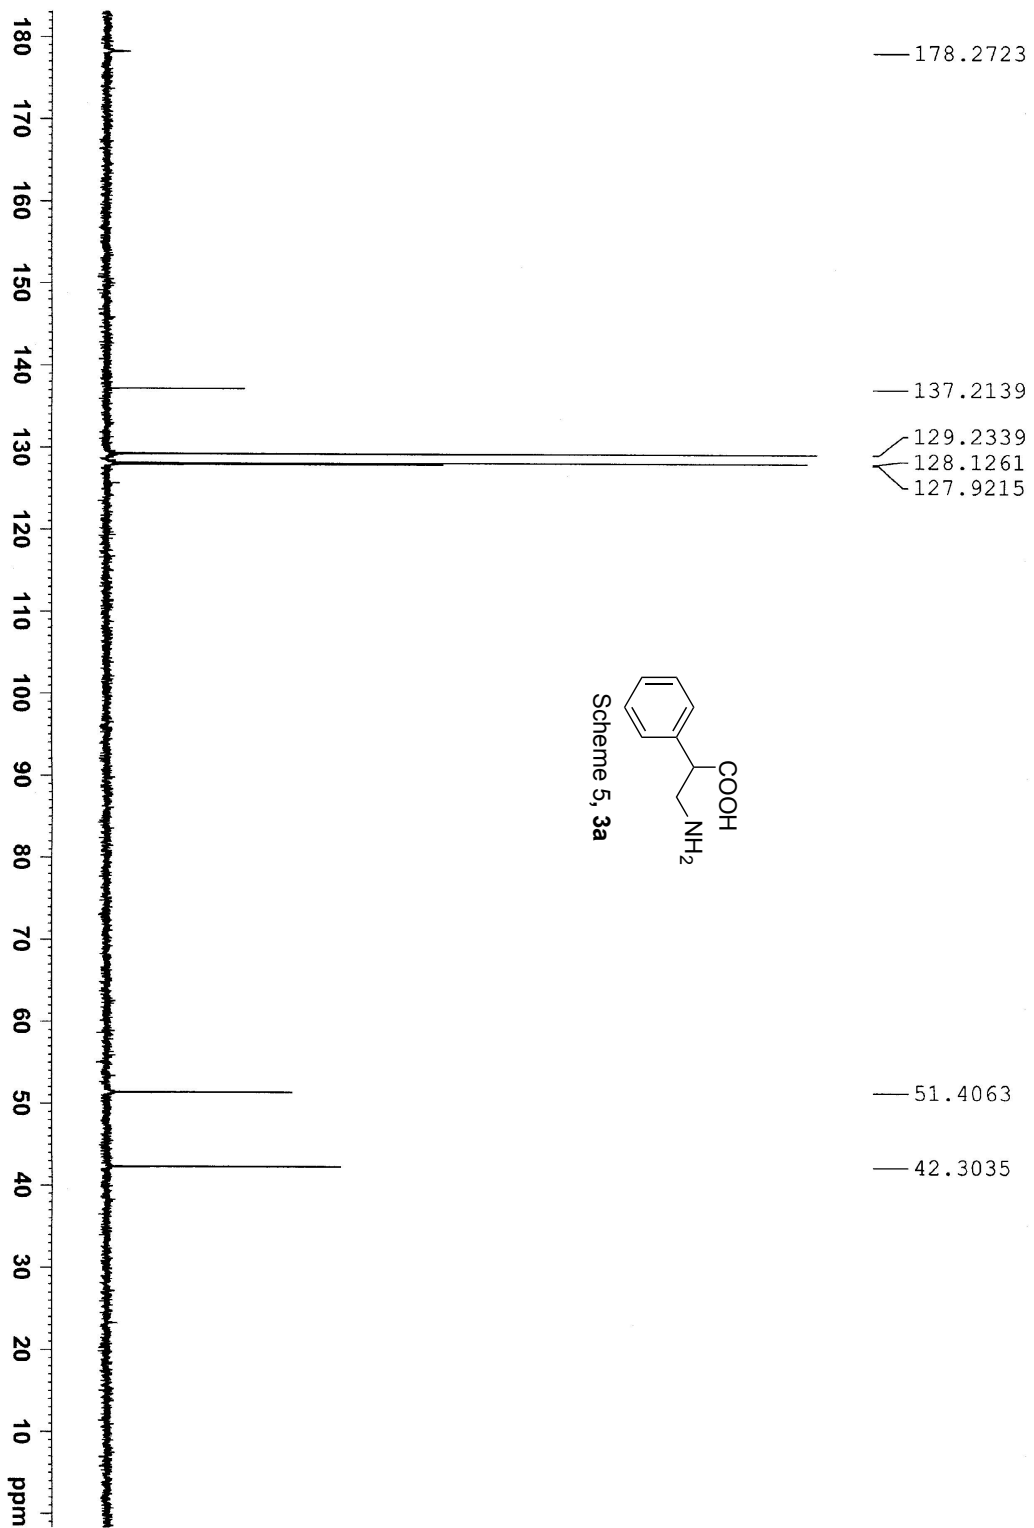

Supplement: c6qo00353b1.pdf [file c6qo00353b1.pdf]
